1           The cerebellum is involved in processing of predictions and  
2           prediction errors in a fear conditioning paradigm

3  
4 Ernst TM<sup>1,2</sup>, Brol A<sup>1</sup>, Gratz M<sup>2,3</sup>, Ritter C<sup>1</sup>, Bingel U<sup>1</sup>, Schlamann M<sup>4,5</sup>, Maderwald S<sup>2</sup>, Quick  
5 HH<sup>2,3</sup>, Merz CJ<sup>6\*</sup>, Timmann D<sup>1,2\*</sup>

6 \* shared senior authorship

7  
8 **Affiliations:**

9           <sup>1</sup> Department of Neurology, Essen University Hospital, Essen, Germany

10          <sup>2</sup> Erwin L. Hahn Institute for Magnetic Resonance Imaging, University of Duisburg-  
11          Essen, Essen, Germany

12          <sup>3</sup> High-Field and Hybrid MR Imaging, Essen University Hospital, Essen, Germany

13          <sup>4</sup> Institute of Diagnostic and Interventional Radiology and Neuroradiology, Essen  
14          University Hospital, Essen, Germany

15          <sup>5</sup> Department of Neuroradiology, University Hospital Cologne, Cologne, Germany

16          <sup>6</sup> Institute of Cognitive Neuroscience, Department of Cognitive Psychology, Ruhr  
17          University Bochum, Bochum, Germany

18  
19 **Corresponding author:**

20 Ernst, Thomas M.

21 Essen University Hospital, Dept. of Neurology

22 Hufelandstr. 55, 45147 Essen, Germany

23 Email: thomas.ernst@uk-essen.de

24 Phone +49 201 723 2594, Fax +49 201 723 5969

25  
26 **Running title:** Cerebellum and fear conditioning

27 **Keywords:** Emotions; extinction; fear; vermis; cerebellar hemisphere; aversive conditioning

28 **Acknowledgments:** Funded by the Deutsche Forschungsgemeinschaft (DFG, German  
29 Research Foundation) – project number 316803389, SFB 1280, subprojects A05, A09, and  
30 A11

31 **Abstract**

32 Prediction errors are thought to drive associative fear learning. Surprisingly little is known  
33 about the possible contribution of the cerebellum. To address this question, healthy  
34 participants underwent a differential fear conditioning paradigm during 7T magnetic  
35 resonance imaging. An event-related design allowed us to separate cerebellar fMRI signals  
36 related to the visual conditioned stimulus (CS) from signals related to the subsequent  
37 unconditioned stimulus (US; an aversive electric shock). We found significant activation of  
38 cerebellar lobules Crus I and VI bilaterally related to the CS+ compared to the CS-. Most  
39 importantly, significant activation of lobules Crus I and VI was also present during the  
40 unexpected omission of the US in unreinforced CS+ acquisition trials. This activation  
41 disappeared during extinction when US omission became expected. These findings provide  
42 evidence that the cerebellum has to be added to the neural network processing predictions  
43 and prediction errors in the emotional domain.

## 44 **Introduction**

45 Cerebellar disease has long been known to result in disordered motor performance and  
46 motor learning (Holmes, 1908; McCormick and Thompson, 1984). Evidence has accumulated  
47 that cerebellar patients also present with various degrees of cognitive, emotional and  
48 behavioral abnormalities (Schmahmann and Sherman, 1998). Because the microscopic  
49 structure of the cerebellum is highly homogeneous, it is often assumed that the cerebellum  
50 performs one single neural operation (Caligiore et al., 2017; Miall and Galea, 2016; Popa et  
51 al., 2014; Sokolov et al., 2017). The most popular current hypothesis states that the  
52 cerebellum acts as or is part of a predictive device (Popa and Ebner, 2018 for recent review).  
53 In the motor domain, it is assumed that the cerebellum is crucially involved in the prediction  
54 of the sensory consequences of motor commands thought to be achieved via internal  
55 models (Bastian, 2006; Miall et al., 1993; Wolpert et al., 1998). These internal models have  
56 to be constantly adapted due to a constantly changing inner and outer environment.  
57 Assumedly, the difference between the predicted and actual sensory outcome results in a  
58 sensory prediction error used to adapt the internal model and subsequent motor behavior.  
59 Although most studies have been performed in the motor domain, there is initial evidence  
60 that the cerebellum is involved in predictive control in the cognitive domain (Lesage et al.,  
61 2012; Lesage et al., 2017; Moberget et al., 2014). The aim of the present study was to show  
62 that this assumption also applies to the emotional domain.

63 Fear conditioning was used as a model system because the cerebellum is involved in the  
64 acquisition of learned fear responses (Lange et al., 2015; Maschke et al., 2002; Ploghaus et  
65 al., 1999; Sacchetti et al., 2002), and has known connections with several parts of the neural  
66 network underlying fear conditioning, including the limbic system (Badura et al., 2018; Blatt  
67 et al., 2013). Furthermore, prediction errors are thought to be the main drivers of associative  
68 fear learning (Holland and Schiffino, 2016; Rescorla and Wagner, 1972). In the fear  
69 conditioning literature, however, the possible role of the cerebellum in aversive prediction  
70 error processing has largely been ignored (Apps and Strata, 2015; Tovote et al., 2015).  
71 Previous studies focused on the role of the amygdala, insula, midbrain periaqueductal gray  
72 and striatum (Boll et al., 2013; Li et al., 2011; Li and McNally, 2014). We wanted to provide

73 initial evidence that the cerebellum has to be added to the neural network processing  
74 predictions errors in learned fear responses.

75 During fear conditioning, participants learn to predict that the initially neutral conditioned  
76 stimulus (CS) is followed by an unpleasant unconditioned stimulus (US). As a result, fear  
77 responses are elicited already at the time of CS presentation. The initial occurrence of the US  
78 is unexpected and has been considered as an error signal (Taylor and Ivry, 2014). An event-  
79 related functional magnetic resonance imaging (fMRI) design allowed us to separate blood  
80 oxygenation level dependent fMRI signals related to the CS from signals related to the  
81 subsequent US. Participants learn within a very limited number of trials that the CS predicts  
82 the occurrence of the US, particularly if appropriate instructions are provided (Atlas et al.,  
83 2016; Tabbert et al., 2011). In case the cerebellum is involved in prediction of the US,  
84 cerebellar fMRI signals should be high during CS presentation. As soon as learning has  
85 occurred, the occurrence of the US is expected. Thus, if the hypothesis is correct that the  
86 cerebellum contributes to aversive prediction errors, cerebellar activation should be  
87 increased at the time of the unexpected omission of the US (due to a partial reinforcement  
88 schedule). During extinction, that is the repeated presentation of CS-only trials, the omission  
89 of the US becomes expected and cerebellar fMRI signals at the time of the US omission  
90 should decrease.

91 In accordance with the fMRI literature (Lange et al., 2015), we found cerebellar activations  
92 related to the prediction of the US. In addition, marked cerebellar activation was present  
93 during the unexpected omission of the US, which disappeared during extinction. Our findings  
94 are consistent with the hypothesis that the cerebellum is involved in the processing of  
95 aversive predictions and prediction errors and has to be added to the neural network  
96 underlying emotional associative learning.

97

## 98 **Materials and Methods**

### 99 **Participants**

100 Experiment power was estimated based on previous eyeblink conditioning data, which had  
101 also been acquired at 7 T (Ernst et al., 2017) using the fmripower toolbox for MATLAB  
102 (fmripower.org; Mumford, 2012). Considering CS-only trials in acquisition and aiming for a  
103 power of 80 % at  $p < 0.001$ , group sizes were estimated to 21 participants for lobule VI  
104 ipsilaterally to US application.

105 A total of 27 young and healthy participants performed the experiment. Three participants  
106 had to be excluded due to technical errors, one participant due to an incidental finding on  
107 brain MRI, and one participant due to constant motion throughout MRI acquisition. Thus, a  
108 total of 22 participants (8 males, 14 females, mean age: 26.9 (SD = 4.3) years, range: 19 to  
109 32 years) were included in the final data analysis. None of the participants presented with  
110 neurological or neuropsychiatric disorders based on medical history. None were taking  
111 centrally-acting drugs, except two who were taking a low dosage of a corticosteroid and an  
112 antihistamine, respectively. All participants were right-handed based on the Edinburgh  
113 handedness inventory (Oldfield, 1971) and had normal or corrected-to-normal vision. They  
114 were asked to refrain from alcohol consumption the night before the experiment. Informed  
115 consent was obtained from all participants. The study was approved by the local ethics  
116 committee and conducted in accordance with the Declaration of Helsinki.

### 117 **Fear conditioning**

118 The entire experiment was performed within one session inside the MRI scanner. The  
119 paradigm presentation was controlled by a computer running the software Presentation  
120 (version 16.4, Neurobehavioral System Inc., Berkeley, CA). **Figure (Fig.) 1** displays the  
121 experimental paradigm. Participants were shown images of the visual stimuli used in the  
122 experiment and told that electrical shocks would be applied during the experiment. They  
123 were instructed that, should they perceive a pattern between CS and US presentations, the  
124 experimenter would not change it during the experiment.

125

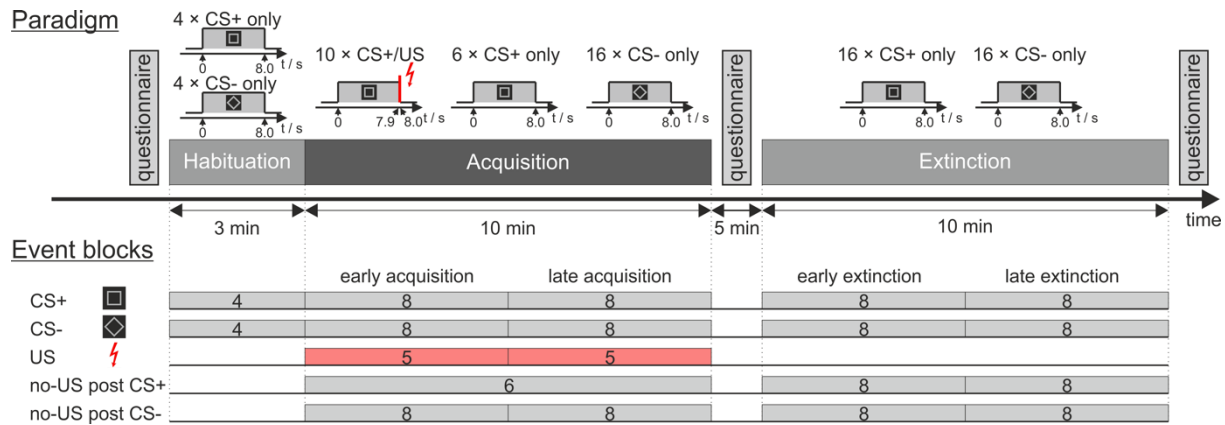

126

127 **Figure 1:** Experimental paradigm and overview of individual events. CS = conditioned  
 128 stimulus; US = unconditioned stimulus. For further details see text.

129

130 Visual stimuli were projected onto a rear projection screen inside the scanner bore using a  
 131 standard projector. Images were visible to the participants through a mirror mounted on the  
 132 radiofrequency (RF) head coil. Two pictures of black-and-white geometric figures (a square  
 133 and a diamond shape, i.e. the square tilted by 45°) of identical brightness were used as CS+  
 134 and CS- (time of presentation: eight seconds). In reinforced CS+ trials (i.e. 10 out of 16  
 135 acquisition trials), the visual stimulus co-terminated with the presentation of the aversive  
 136 US. In CS- trials, the visual stimulus was never followed by the aversive US. A neutral black  
 137 background image was displayed in between visual stimulus presentations (ITI randomized  
 138 between 16 s and 20 s). Use of the two figures as CS+ and CS- was pseudo-randomly  
 139 counterbalanced between the individual participants.

140 A short electrical stimulation was used as an aversive US. The electrical stimulation was  
 141 generated by a constant current stimulator (DS7A, Digitimer Ltd., London, UK) and applied to  
 142 the left hand via a concentric (ring-shaped) bipolar surface electrode with 6 mm conductive  
 143 diameter and a central platinum pin (WASP electrode, Specialty Developments, Bexley, UK).  
 144 For MR-safety reasons, an in-house build non-magnetic high-resistivity electrode lead was  
 145 used to connect the stimulator with the surface electrode (Schmidt et al., 2016). The 100 ms  
 146 US consisted of a short train of four consecutive 500  $\mu$ s current pulses (maximum output  
 147 voltage: 400 V) with an inter pulse interval of 33 ms. Immediately before start of MRI  
 148 measurements, stimulation current was gradually increased, and participants were asked to  
 149 report on the perceived sensation intensity until an “unpleasant but not painful” intensity

150 was reached (mean current: 3.9 (SD = 2.3) mA, range 1.6 to 9.3 mA). The final individual  
151 current setting was kept constant for all stimulations. Stimulus timing was set for the US to  
152 co-terminate with visual CS+ presentation.

153 During the experiment three types of trials were presented to the participants: CS+ followed  
154 by an US (paired CS+/US trial), CS+ without an US (CS+ only trial) and CS- without US  
155 (CS- only trial). The experimental protocol consisted of the three phases: "habituation" (4  
156 CS+ only trials, 4 CS- only trials, presented in alternating order), "acquisition" (10 paired  
157 CS+/US trials, 6 CS+ only trials, 16 CS- only trials) and "extinction" (16 CS+ trials, 16 CS- only  
158 trials). Different trials types in acquisition and extinction were presented in a  
159 pseudorandomized order with four restrictions: Firstly, the first two trials of acquisition were  
160 set to be paired CS+/US trials, secondly, there were never more than two consecutive CS of  
161 one kind presented in a row, thirdly, during acquisition and extinction the number of events  
162 of each kind was kept identical in the first half and in the second half of the experiment, and  
163 fourthly, the very last trial of acquisition was set to be a paired CS+/US trial. During  
164 acquisition, the order of events was the same for all participants, while use of the two  
165 different figures as CS+ and CS- was counterbalanced across the whole group. Order of CS+  
166 and CS- events was counterbalanced during extinction (12 starting with CS+, 10 starting with  
167 CS-), and habituation (15 starting with CS+, 7 starting with CS-). Each experimental phase  
168 was performed within a separate block of fMRI data acquisition.

### 169 **Questionnaires**

170 Participants were required to answer three questionnaires, one before the start of the  
171 experiment, a second one in between acquisition phase and extinction phase and a third  
172 questionnaire after the experiment. The first and the third questionnaires were print copies  
173 handed out to the participant. The second questionnaire was projected onto the screen  
174 inside the MRI scanner bore one question at a time and answers were given orally via an  
175 intercom system.

176 Participants were asked to rate their (hedonic) valence and (emotional) arousal on viewing  
177 images of the CS+ and CS- on a nine-step Likert scale from "very unpleasant" to "very  
178 pleasant" and "quiet and relaxed" to "very excited", respectively. Additionally, the  
179 questionnaire following acquisition contained five questions regarding US perception and

180 CS-US contingency: rating of the last US on a nine step-scale ("not unpleasant" to "very  
181 unpleasant"); a multiple-choice question and an percentage estimate whether the US was  
182 applied after the presentation of the square and the diamond shaped CS (options: "always",  
183 "sometimes", "never", "I cannot answer"); and lastly an estimation after which time and  
184 number of US presentations, if at all, a connection between the visual stimuli and the US  
185 presentation was identified.

186 Statistical analyses were performed using SPSS software (Version 24, IBM Corp., Armonk,  
187 NY). Using repeated measure analyses of variance (ANOVA) valence and arousal ratings were  
188 tested for within subject effects of stimulus type (CS+ vs. CS-) and phase (pre-acquisition,  
189 post-acquisition vs. post-extinction). Where necessary individual ratings were compared  
190 with post-hoc *t*-tests.

### 191 **Physiological data acquisition**

192 Physiological data measured throughout the experiment were skin conductance response  
193 (SCR), pulse rate and breathing rate. Skin conductance (SC) was acquired using a  
194 physiological data acquisition station with a dedicated MRI-compatible SC module and  
195 appropriate hardware filters sampling at 2 kHz (EDA 100C-MRI, BIOPAC Systems Inc., Goleta,  
196 CA). SC electrodes were attached to the participants' left middle and ring fingers.

197 Pulse rate and breathing rate were measured using the physiologic monitoring unit (PMU)  
198 provided by the MRI scanner (Siemens Healthcare GmbH, Erlangen, Germany). In detail,  
199 pulse oximetry signals were recorded using a wireless recording device clipped to the  
200 participant's right index finger. A respiratory bellows was attached to the participant's lower  
201 abdomen using a hook-and-loop belt.

### 202 **Skin conductance analysis**

203 To eliminate high-frequency noise and low-frequency drifts SC data was bandpass filtered  
204 (-61 dB Blackman FIR filter, 0.5 to 10 Hz) using AcqKnowledge software (BIOPAC Systems  
205 Inc., Goleta, CA). All further SC data processing was performed using MATLAB software  
206 (Release 2017a, The MathWorks Inc., Natick, MA). Semi-automated peak detection was  
207 performed, and SCR were defined as the maximum trough-to-peak-amplitude of any SCR  
208 peak within a given time interval. In each trial, SCR were evaluated for three distinct time  
209 windows (Prokasy and Ebel, 1967): the first interval response (FIR) within a time window of



210 1.0 s to 5.0 s after CS onset, the second interval response (SIR) within a time window of 5.0 s  
211 to 8.5 s after CS onset, and the unconditioned response window (i.e. third interval response,  
212 TIR) 8.5 s to 13.0 s after CS onset (irrespective whether a US was presented in the particular  
213 trial or not) (**Fig. 2b**). To normalize data SCR values were increased by 1  $\mu$ S and logarithmized  
214 (Boucsein, 2012; Venables and Christie, 1980). Mean SCR values were calculated grouped for  
215 blocks of five, six and eight events, corresponding to the first-level regressor selection in MRI  
216 analysis.

217 Statistical analyses were performed using SPSS software (Version 24, IBM Corp., Armonk,  
218 NY). ANOVA with repeated measures were calculated for within subject effects of  
219 stimulus type (CS+ vs. CS-) and block (early vs. late) considering SCR values as dependent  
220 measure. Appropriate post-hoc *t*-tests were calculated. Because there was only one block of  
221 unpaired CS+ trials in acquisition (see **Fig. 1**), differences of TIR in unpaired CS+ trials with  
222 TIR in paired CS+ and CS- trials were analyzed using *t*-tests.

### 223 **MRI acquisition**

224 All MR images were acquired with the participants lying supine inside a whole-body MRI  
225 system operating at 7 Tesla magnetic field strength (MAGNETOM 7T, Siemens Healthcare  
226 GmbH, Erlangen, Germany) equipped with a 1-channel transmit / 32-channel receive RF  
227 head coil (Nova Medical, Wilmington, MA). To homogenize the RF excitation field (B1), three  
228 dielectric pads filled with high-permittivity fluid were placed below and on either side of  
229 each participants' upper neck (Teeuwisse et al., 2012). As needed, further cushions were  
230 used to fix the head position within the RF coil.

231 Prior to fMRI acquisition a sagittal MP2RAGE sequence (Gallichan and Marques, 2017;  
232 Marques et al., 2010) was run to acquire whole-brain anatomical reference images with an  
233 isotropic voxel size of 0.75 mm. Further imaging parameters were set as follows: TR/TE,  
234 6000/3.45 ms, T11/T12, 800/2700 ms, flip angles 1/2, 4°/5°, parallel acceleration factor, 3,  
235 phase and slice partial Fourier factor, 6/8, acquisition matrix, 320 × 300, number of slices,  
236 192, TA, 9:40 min.

237 Whole brain functional fMRI acquisition was performed using a fat-saturated, two-  
238 dimensional simultaneous multi slice echo planar image (SMS-EPI) sequence (Cauley et al.,  
239 2014; Setsompop et al., 2012) with an isotropic voxel size of 1.7 mm, in three consecutive

240 episodes for habituation (90 volumes), acquisition and extinction (320 volumes each).  
241 Imaging parameters were selected as follows: TR/TE, 2000/22 ms, flip angle, 70°, parallel  
242 acceleration factor, 2, SMS factor, 3, phase partial Fourier factor, 6/8, acquisition matrix,  
243 130 × 130, number of slices, 90.

#### 244 **Image processing**

245 All image and fMRI analyses were performed using SPM 12 (Wellcome Department of  
246 Cognitive Neurology, London, UK) on a platform running MATLAB on Mac OS X 10.12.6, if not  
247 explicitly stated otherwise. SPM default brightness threshold was set from 0.8 to 0.1 to avoid  
248 signal dropouts within the hypointense cerebellar nuclei (Thürling et al., 2015).

249 Brain extraction was performed on non-denoised uniform T1 weighted (UNI) volumes using  
250 the CBS tools for high-resolution processing of high-field brain MRI (Bazin et al., 2014). Best  
251 coregistration of the mean functional volume to the brain extracted structural volume was  
252 achieved by using the function "epi\_reg" available in FSL (Release 5.0.10, Centre for  
253 Functional MRI of the Brain, Oxford, UK).

254 Normalization of the cerebellum was performed using the SUIT-toolbox for SPM (version  
255 3.1). Using the spatially unbiased atlas template of the human cerebellum (SUIT,  
256 Diedrichsen, 2006) brain-extracted structural volumes were segmented, and cerebellar  
257 masks were generated. Manual correction of each mask was performed by an experienced  
258 technician using MRICron software (Rorden and Brett, 2000). The segmented structural  
259 images and the cortical cerebellar mask were supplied to a ROI-based DARTEL normalization  
260 algorithm available within the SUIT toolbox, and a cerebellar normalization was calculated.  
261 In addition, whole-brain normalization to MNI-space was obtained using the SPM segment  
262 routine.

263 Functional MRI volumes for each participant were corrected for slice timing and realigned to  
264 the first volume of the habituation phase. Functional volumes were then separately  
265 normalized to SUIT space (cerebellum only) and MNI space (whole brain), and smoothed by  
266 an isotropic smoothing kernel of 4 mm.

#### 267 **fMRI analysis**

268 We focused our fMRI analysis on the cerebellum. In addition, exploratory analysis of the  
269 whole brain was performed. The first-level analysis was modelled as an event related-design

270 (durations set to 0 s). The first five volumes of each fMRI run were disregarded. Events were  
271 blocked into 19 regressors of interest as displayed in **Fig. 1**. If number of trials allowed  
272 ( $n \geq 4$ ), events of each kind were grouped in two equal-sized blocks representing the first  
273 (early) and the second (late) half of each phase. Regressors were chosen for CS+ and  
274 CS- during habituation (2 regressors, 4 events each), CS+ and CS- presentations during  
275 acquisition and extinction (8 regressors, 8 events each), US presentations during acquisition  
276 (2 regressors, 5 events each), and the omission of US presentations (no-US) at the expected  
277 time of US presentations after CS onset (no-US post CS+: 1 regressor, 6 events during  
278 acquisition, 2 regressors, 8 events each during extinction; no-US post CS-: 4 regressors, 8  
279 events each during acquisition and extinction).

280 To correct for motion, volume realignment parameters were prepared as six nuisance  
281 regressors (three translations and three rotations). Pulse oximetry and respiration data from  
282 PMU were processed using essential features of the PhLEM toolbox for SPM (Verstynen and  
283 Deshpande, 2011). Heart beat and breathing rate detection were manually verified and if  
284 needed corrected. To correct for physiological motion effects the RETROICOR (retrospective  
285 image-based correction) method was applied and eight regressors were generated (Glover  
286 et al., 2000), resulting in a total of 14 nuisance regressors for each fMRI run.

287 First level main effect contrasts against rest and differential first level contrasts were  
288 generated and tested in second level *t*-tests. The contrast “US post CS+ > no-US post CS-”  
289 was calculated to reveal activation in response to the presentation of the aversive stimulus  
290 (US). The contrast “CS+ > CS-” was calculated to reveal activation related to the prediction of  
291 the US. Finally, the contrast “no-US post CS+ > no-US post CS-” was calculated to reveal  
292 activation related to the omission of the US. To evaluate differences between early and late  
293 acquisition and extinction, individual second level within-subject ANOVA were modelled for  
294 the contrasts “CS+ > CS-” and “no-US post CS+ > no-US post CS-”, and (for acquisition only)  
295 for the contrast “US post CS+ > no-US post CS-”. Threshold-free cluster enhancement (TFCE)  
296 was applied using the TFCE toolbox for SPM12 (R164 and R174, [http://dbm.neuro.uni-](http://dbm.neuro.uni-jena.de/tfce/)  
297 [jena.de/tfce/](http://dbm.neuro.uni-jena.de/tfce/)).

298 In addition, second level one-way ANOVA was modeled for the three main acquisition  
299 contrasts (considering early and late acquisition together). To identify regions of shared

300 activation conjunction analysis (Price and Friston, 1997) was performed to test global null  
301 hypotheses for each of the three contrasts. Using the same second level model main effect  
302 of contrast was calculated to assess differences between the three contrasts ( $F$ -test, contrast  
303 vector: [1 -1 0; 0 1 -1]).

304 Psychophysiological interactions were modelled for the whole brain analysis (Friston et al.,  
305 1997) using cerebellar volumes of interest (VOI) based on conjunction analysis in SUIT space  
306 as seed regions. TFCE was applied on the results. Additionally, region mean  $\beta$  values for  
307 selected VOIs were extracted from simple first level  $\beta$  maps against rest and compared  
308 between CS and US events using ANOVA and paired  $t$ -tests.

309 To display results, cerebellar (SUIT space) activation maps were plotted on cerebellar  
310 flatmaps (Diedrichsen and Zotow, 2015). Whole brain MNI space activation maps were  
311 projected on MNI152 average T1 volume provided with SPM (icbm\_avg\_152\_t1\_tal\_lin.nii).  
312 Activation maps were masked in SUIT space using the SUIT atlas volume (Cerebellum-  
313 SUIT.nii) with the inner-cerebellar white matter manually filled in, and in MNI space using  
314 the SPM canonical inner-cranial volume mask (mask\_ICV.nii). To acquire anatomical region  
315 labels, maps were then projected onto the SUIT atlas volume (Cerebellum-SUIT.nii,  
316 Diedrichsen, 2006) and the AAL atlas volume (AAL.nii, Tzourio-Mazoyer et al., 2002),  
317 respectively.

318

## 319 **Results**

### 320 **Behavioral data**

#### 321 ***Questionnaires***

322 *Valence and arousal ratings:* After habituation and prior to acquisition, there was no  
323 difference in (hedonic) valence and (emotional) arousal ratings of the CS+ and CS- (**Fig. 2a**).  
324 After acquisition, valence of the CS+ was rated less pleasant than of the CS-. Additionally,  
325 arousal to the CS+ was rated higher than to the CS-. Differences between CS+ and CS- ratings  
326 remained after extinction, a finding that has been reported as resistance to extinction in  
327 evaluative conditioning research (e.g. Blechert et al., 2008; Vansteenwegen et al., 2006).  
328 ANOVA with repeated measures showed a significant difference within stimulus types and  
329 phases (pre-acquisition, post-acquisition, post-extinction) considering both valence and  
330 arousal (main effects: all  $p < 0.002$ ). Valence and arousal ratings differed between stimulus  
331 type and phases (interaction stimulus type  $\times$  phase: valence:  $F_{2,42} = 14.95$ ,  $p < 0.001$ ; arousal:  
332  $F_{2,42} = 15.30$ ,  $p < 0.001$ ). Post hoc tests showed a significant difference between stimulus  
333 types after acquisition and after extinction (all  $p \leq 0.005$ ; paired  $t$ -test), but not prior to  
334 acquisition (valence:  $p = 0.781$ , arousal:  $p = 0.125$ ).

335 *US unpleasantness und CS-US contingency:* After acquisition, the mean US unpleasantness  
336 rating was 6.9 (SD = 1.4) on a 9-point scale from "not unpleasant" to "very unpleasant". All  
337 participants were aware of CS-US contingencies after the acquisition phase: The mean  
338 estimated probability that a CS+ was followed by an US was 70.0% (SD = 13.0%). All but one  
339 participant estimated a 0% probability of a CS- being followed by a US, with the remaining  
340 participant stating a 10% chance. Participants stated that they became aware of CS-US  
341 contingencies after 2.9 min (SD = 1.2 min), or 2.6 (SD = 0.8) US events.

#### 342 ***Skin conductance responses (SCR)***

343 During habituation, SIR was not significantly different in CS+ and CS- trials ( $t_{21} = 0.708$ ,  
344  $p = 0.487$ ; paired  $t$ -test) (**Fig. 2c**). During fear acquisition, SIR was significantly higher in CS+  
345 trials compared to CS- trials (**Fig. 2c**). This difference was most pronounced in the second  
346 half of the acquisition phase. ANOVA with repeated measures showed a significant main  
347 effect of stimulus type (CS+ vs. CS-;  $F_{1,21} = 5.182$ ,  $p = 0.033$ ) and block (early vs. late;

348  $F_{1,21} = 5.589, p = 0.028$ ). The stimulus type by block interaction was not significant  
349 ( $F_{1,21} = 1.409, p = 0.249$ ).

350 During fear extinction, SIR related to the CS+ declined. In the second half of extinction the  
351 difference between CS+ and CS- trials vanished (**Fig. 2c**). The main effects of stimulus type  
352 (CS+ vs. CS-;  $F_{1,21} = 2.923, p = 0.102$ ) and block (early vs. late;  $F_{1,21} = 3.930, p = 0.061$ ) were  
353 not significant. ANOVA with repeated measures showed a significant stimulus type by block  
354 interaction ( $F_{1,21} = 5.035, p = 0.036$ ). Post hoc testing showed a significant difference  
355 between stimulus type during early ( $t_{21} = 2.24, p = 0.036$ ), but not during late extinction  
356 ( $t_{21} = -0.36, p = 0.723$ ).

357 Findings concerning FIR were comparable to SIR and are summarized in **Supplement (Supp.)**  
358 **Fig. 1** and **Table 1**.

359 SCRs in the unconditioned response (UR) window (i.e. the third interval response, TIR) were  
360 significantly higher in paired CS+ trials (US post CS+) compared to CS- trials (no-US post CS-)  
361 ( $F_{1,21} = 93.70, p < 0.001$ ) indicating a successful increase in SCR towards the electric shock  
362 (**Fig. 2d**). Block effect was significant (early vs. late;  $F_{1,21} = 21.97, p < 0.001$ ) revealing higher  
363 UR during early compared to late acquisition. The block by stimulus type interaction was not  
364 significant ( $F_{1,21} = 0.75, p = 0.396$ ). TIR was also significantly higher in unpaired CS+ trials  
365 (no-US post CS+) compared to CS- trials (no-US post CS-) during late acquisition ( $t_{21} = 3.72,$   
366  $p = 0.001$ ) but not early acquisition ( $t_{21} = 1.74, p = 0.096$ ), showing a higher US expectancy in  
367 US omission trials. TIR in unpaired CS+ trials was significantly smaller compared to TIR in  
368 paired CS+ trials (paired  $t$ -tests, all  $p$  values  $< 0.001$ ). During extinction, TIR was not  
369 significantly different comparing stimulus types (no-US post CS+ vs. no-US post CS-;  
370  $F_{1,21} = 3.46, p = 0.077$ ), blocks (early vs. late;  $F_{1,21} = 3.72, p = 0.067$ ) or their interaction  
371 (stimulus type by block;  $F_{1,21} = 0.02, p = 0.878$ ).

372 Taken together, we could show successful fear acquisition and extinction as well as a  
373 response towards the presentation and the omission of the US during fear acquisition.

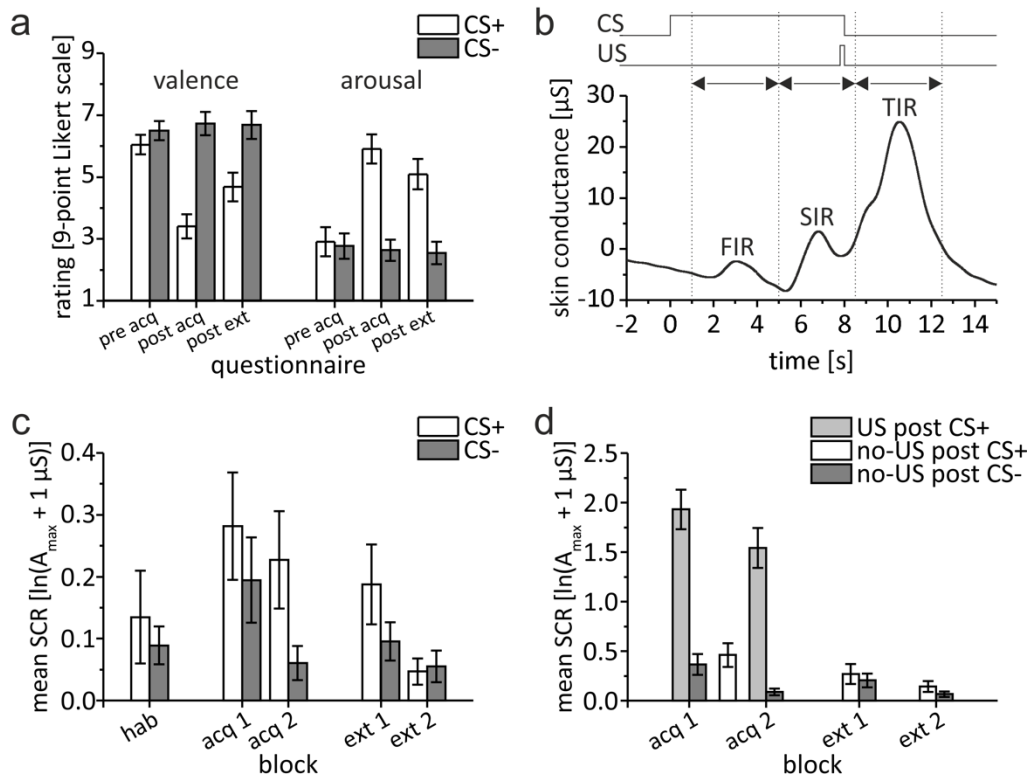

374

375 **Figure 2:** Behavioral data. **a)** Group mean valence and arousal ratings for CS+ and CS- during  
 376 acquisition and extinction. **b)** Example of bandpass filtered individual skin conductance  
 377 response (SCR) in a paired CS+/US trial depicting response interval windows and displaying a  
 378 distinct response in each interval. **c)** Group mean second interval response (SIR). **d)** Group  
 379 mean third interval response (TIR). Please note the different scales of the y-axis used for  
 380 illustration purposes. Error bars represent standard errors of the mean. hab = habituation,  
 381 acq 1, acq 2 = early and late acquisition, ext 1, ext 2 = early and late extinction.

382 **fMRI data**

383 We were interested in cerebellar activations related to i) the presentation, ii) the prediction,  
384 and iii) the omission of the aversive electrical stimulation (that is, the US). Focus of data  
385 analysis was on cerebellar activations. In addition, exploratory data on whole brain analysis  
386 is presented. Activation clusters are reported which are significant after application of  
387 threshold-free cluster-enhancement (TFCE) at  $p < 0.05$  familywise error (FWE) corrected  
388 level.

389 ***Cerebellar analysis***

390 *Cerebellar activation related to the presentation of the aversive stimulus [contrast*  
391 *“US post CS+ > no-US post CS-”*]: Widespread cerebellar activation was observed within the  
392 cerebellar vermis and both cerebellar hemispheres (**Fig. 3a**; see also **Table 1**). Most  
393 prominent differential activations were found in the anterior and posterior vermis (local  
394 maxima in lobules I-IV, V) and the left hemisphere (that is ipsilateral to the presentation of  
395 the US; local maximum in Crus I). Activation was not confined to the cerebellar cortex, but  
396 extended into the cerebellar nuclei (including dentate, interposed and fastigial nuclei  
397 bilaterally).

398 To assess changes in differential cerebellar activation across the two acquisition blocks (early  
399 and late) an *F*-test based on second level within-subject ANOVA was calculated. No  
400 significant main effect of block was observed during acquisition (at  $p < 0.05$  FWE corrected  
401 level, based on the TFCE statistic).

402 *Cerebellar activation related to the prediction of the aversive stimulus [contrast “CS+ > CS-”*]:  
403 Cerebellar activation related to the CS+ was significantly higher in the lateral cerebellar  
404 hemispheres compared to activation related to the CS- (**Fig. 3b**). Cerebellar activation was  
405 present in the more lateral parts of lobules VI and Crus I bilaterally (see also **Table 1**).  
406 Additional differential activation was present in lobules VIIIa and VIIIb in the right cerebellar  
407 hemisphere. During extinction, cerebellar activation related to the CS+ was not significantly  
408 different from activation related to the CS- (at  $p < 0.05$  FWE corrected level, based on the  
409 TFCE statistic).

410 *F*-tests revealed no significant block effects (early vs. late) neither during acquisition nor  
411 during extinction (at  $p < 0.05$  FWE corrected level, based on the TFCE statistic). The main



412 effect of block across all four blocks (that is early and late acquisition, early and late  
413 extinction) revealed two clusters in the lateral cerebellum with local maxima in left lobule  
414 Crus I and right lobule VI (**Table 1; Supp. Fig. 2a**). As can be seen from mean  $\beta$  values of both  
415 clusters across blocks (see insert in **Supp. Fig. 2a**), differential activation in the two clusters  
416 decreased during extinction compared to acquisition.

417 *Cerebellar activation related to the omission of the aversive stimulus [contrast “no-*  
418 *US post CS+ > no-US post CS-”]*: During acquisition, significant differential activation related  
419 to the (unexpected) omission of the US was found in the cerebellar hemispheres and the  
420 vermis (**Fig. 3c**). Activation at the time of the expected US in unpaired CS+ trials compared to  
421 CS- trials was most prominent in the left cerebellar hemisphere with local maxima in lobules  
422 Crus I and VI (**Table 1**). Additional activation was present in the right hemisphere (local  
423 maxima in lobules Crus I and VI) and the vermis. Vermal activation was found in the anterior  
424 vermis (lobules I-IV, V) and the posterior vermis (lobules VIIb-IX). Activation extended into  
425 the cerebellar nuclei (including dentate, interposed and fastigial nuclei bilaterally). During  
426 extinction, cerebellar activation related to the (expected) omission of the US strongly  
427 decreased. Only one smaller cluster remained in more medial parts of left Crus I (**Table 1;**  
428 **Supp. Fig. 2c**).

429 *F*-tests revealed no significant block effects (early vs. late) neither during acquisition nor  
430 during extinction (at  $p < 0.05$  FWE corrected level, based on the TFCE statistic). The main  
431 effect of block across all four blocks (that is early and late acquisition, early and late  
432 extinction) revealed a large cluster in the left hemisphere, primarily within lobule Crus I with  
433 some extension to lobule VI and Crus II (**Table 1; Supp. Fig. 2b**). As can be seen from mean  $\beta$   
434 values across blocks (insert in **Supp. Fig. 2b**), differential activation decreased during  
435 extinction compared to acquisition.

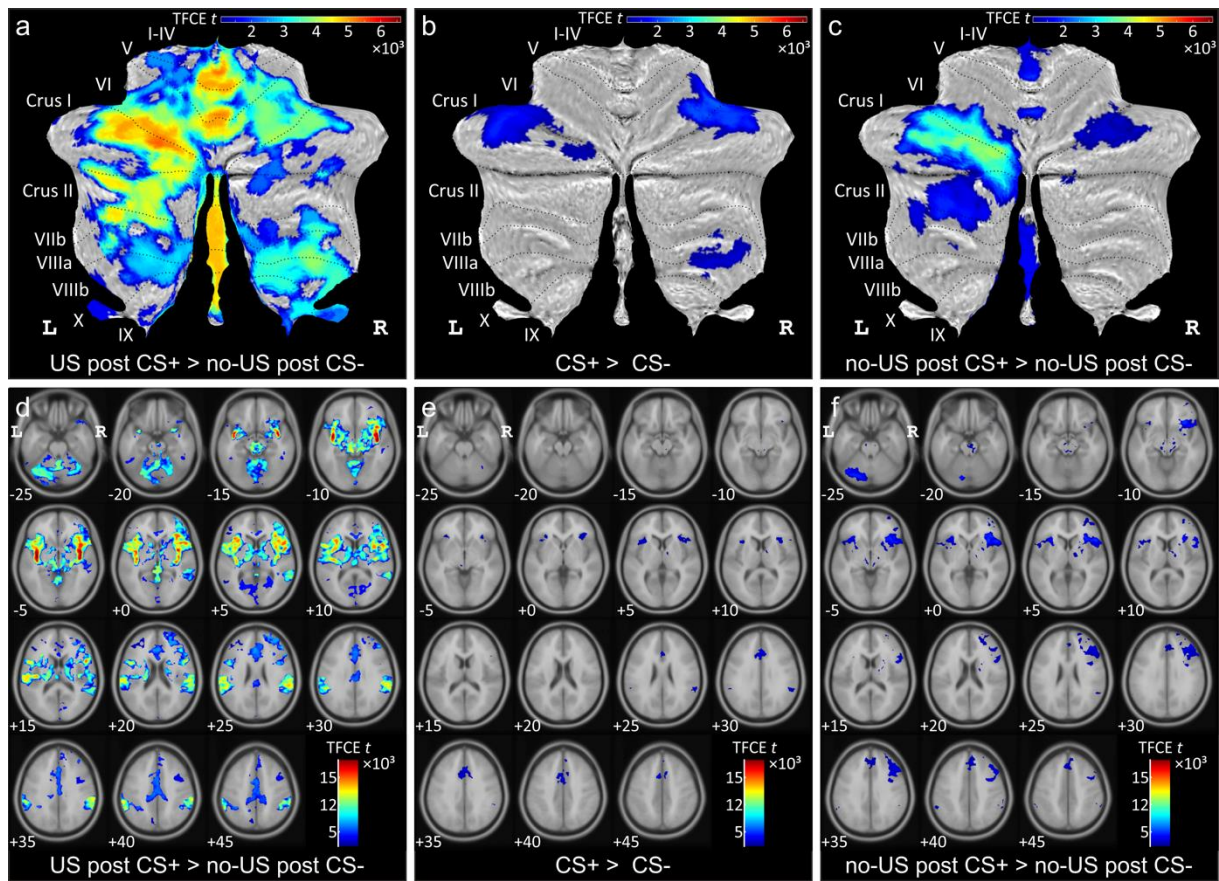

436  
437 **Figure 3:** (a-c) Differential cerebellar activations during fear acquisition in SUIT space  
438 projected on a cerebellar flatmap (Diedrichsen and Zotow, 2015). (d-f) Corresponding  
439 differential whole brain activations in MNI normalized space. All contrasts calculated using  
440 TFCE and familywise error correction ( $p < 0.05$ ). L = left, R = right

441

442 **Table 1:** Cerebellar activations during acquisition and extinction. Displayed are all clusters of  
 443 20 mm<sup>3</sup> and larger. In each cluster, up to three maxima are listed separated by 8 mm or  
 444 more. Corresponding activations for whole brain analysis are summarized in **Supp. Table 5**.

| Index                                                                                                        | Location (lobule) | Side  | SUIT coordinates / mm                                                                                                                                                                                                                                                                                                                                                                                                                                                                                                                                                                                                                                                                                                 |     |     | Cluster size / mm <sup>3</sup> | $p_{FWE}$ | TFCE   |
|--------------------------------------------------------------------------------------------------------------|-------------------|-------|-----------------------------------------------------------------------------------------------------------------------------------------------------------------------------------------------------------------------------------------------------------------------------------------------------------------------------------------------------------------------------------------------------------------------------------------------------------------------------------------------------------------------------------------------------------------------------------------------------------------------------------------------------------------------------------------------------------------------|-----|-----|--------------------------------|-----------|--------|
| <b>a) US post CS+ &gt; no-US post CS- : acquisition t-test, TFCE, <math>p &lt; 0.05</math>, FWE corr.</b>    |                   |       |                                                                                                                                                                                                                                                                                                                                                                                                                                                                                                                                                                                                                                                                                                                       |     |     |                                |           |        |
| 1                                                                                                            | Extended cluster  |       | left VI (8390), white matter (7950), left Crus I (7889), right VI (6404), right V (4250), left Crus II (4223), left V (4085), right Crus I (3457), right I-IV (2761), left I-IV (2529), right VIIIa (2432), right VIIIb (2244), left VIIIb (1602), left VIIIb (1583), left VIIIa (1536), right VIIb (1467), vermal VI (1368), right IX (1330), vermal VIIIa (1307), right Crus II (1034), right dentate nuc. (921), vermal IX (804), left dentate nuc. (713), left IX (628), vermal VIIIb (474), vermal VIIIb (236), right X (168), vermal Crus II (162), vermal X (120), left interposed nuc. (86), left X (70), right interposed nuc. (69), left fastigial nuc. (23), vermal Crus I (21), right fastigial nuc. (19) |     |     |                                |           |        |
|                                                                                                              | Crus I            | Left  | -26                                                                                                                                                                                                                                                                                                                                                                                                                                                                                                                                                                                                                                                                                                                   | -74 | -27 | 72355                          | 0.001     | 5386.8 |
|                                                                                                              | I-IV              | Left  | 0                                                                                                                                                                                                                                                                                                                                                                                                                                                                                                                                                                                                                                                                                                                     | -53 | -24 |                                | 0.001     | 5373.2 |
|                                                                                                              | V                 | Left  | -3                                                                                                                                                                                                                                                                                                                                                                                                                                                                                                                                                                                                                                                                                                                    | -62 | -23 |                                | 0.001     | 5032.2 |
| 2                                                                                                            | IX                | Left  | -5                                                                                                                                                                                                                                                                                                                                                                                                                                                                                                                                                                                                                                                                                                                    | -47 | -51 | 39                             | 0.025     | 1592.2 |
| 3                                                                                                            | IX                | Right | 7                                                                                                                                                                                                                                                                                                                                                                                                                                                                                                                                                                                                                                                                                                                     | -49 | -61 | 117                            | 0.034     | 1435.8 |
| <b>b) CS+ &gt; CS- : acquisition t-test, TFCE, <math>p &lt; 0.05</math>, FWE corr.</b>                       |                   |       |                                                                                                                                                                                                                                                                                                                                                                                                                                                                                                                                                                                                                                                                                                                       |     |     |                                |           |        |
| 1                                                                                                            | Extended cluster  |       | right Crus I (1506), right VI (1481), white matter (23), right V (16)                                                                                                                                                                                                                                                                                                                                                                                                                                                                                                                                                                                                                                                 |     |     |                                |           |        |
|                                                                                                              | VI                | Right | 35                                                                                                                                                                                                                                                                                                                                                                                                                                                                                                                                                                                                                                                                                                                    | -50 | -31 | 3027                           | 0.004     | 2256.6 |
|                                                                                                              | VI                | Right | 33                                                                                                                                                                                                                                                                                                                                                                                                                                                                                                                                                                                                                                                                                                                    | -60 | -26 |                                | 0.004     | 2174.7 |
|                                                                                                              | Crus I            | Right | 40                                                                                                                                                                                                                                                                                                                                                                                                                                                                                                                                                                                                                                                                                                                    | -57 | -32 |                                | 0.005     | 2082.8 |
| 2                                                                                                            | Extended cluster  |       | left Crus I (1658), left VI (727)                                                                                                                                                                                                                                                                                                                                                                                                                                                                                                                                                                                                                                                                                     |     |     |                                |           |        |
|                                                                                                              | Crus I            | Left  | -44                                                                                                                                                                                                                                                                                                                                                                                                                                                                                                                                                                                                                                                                                                                   | -56 | -33 | 2385                           | 0.006     | 1911.7 |
|                                                                                                              | Crus I            | Left  | -36                                                                                                                                                                                                                                                                                                                                                                                                                                                                                                                                                                                                                                                                                                                   | -53 | -33 |                                | 0.007     | 1851.3 |
|                                                                                                              | Crus I            | Left  | -41                                                                                                                                                                                                                                                                                                                                                                                                                                                                                                                                                                                                                                                                                                                   | -64 | -31 |                                | 0.014     | 1629.8 |
| 3                                                                                                            | Extended cluster  |       | right VIIIa (287), right VIIIb (283), white matter (36), right VIIb (2)                                                                                                                                                                                                                                                                                                                                                                                                                                                                                                                                                                                                                                               |     |     |                                |           |        |
|                                                                                                              | VIIIb             | Right | 28                                                                                                                                                                                                                                                                                                                                                                                                                                                                                                                                                                                                                                                                                                                    | -48 | -49 | 608                            | 0.019     | 1495.2 |
|                                                                                                              | VIIIb             | Right | 22                                                                                                                                                                                                                                                                                                                                                                                                                                                                                                                                                                                                                                                                                                                    | -54 | -48 |                                | 0.020     | 1483.1 |
|                                                                                                              | VIIIa             | Right | 29                                                                                                                                                                                                                                                                                                                                                                                                                                                                                                                                                                                                                                                                                                                    | -58 | -47 |                                | 0.037     | 1263.4 |
| 4                                                                                                            | Crus I            | Left  | -17                                                                                                                                                                                                                                                                                                                                                                                                                                                                                                                                                                                                                                                                                                                   | -76 | -29 | 264                            | 0.036     | 1278.4 |
| 5                                                                                                            | Crus I            | Left  | -34                                                                                                                                                                                                                                                                                                                                                                                                                                                                                                                                                                                                                                                                                                                   | -75 | -25 | 46                             | 0.047     | 1163.4 |
| <b>c) CS+ &gt; CS- : extinction t-test, TFCE, <math>p &lt; 0.05</math> FWE corr.</b>                         |                   |       |                                                                                                                                                                                                                                                                                                                                                                                                                                                                                                                                                                                                                                                                                                                       |     |     |                                |           |        |
| no significant voxels                                                                                        |                   |       |                                                                                                                                                                                                                                                                                                                                                                                                                                                                                                                                                                                                                                                                                                                       |     |     |                                |           |        |
| <b>d) no-US post CS+ &gt; no-US post CS- : acquisition t-test, TFCE, <math>p &lt; 0.05</math>, FWE corr.</b> |                   |       |                                                                                                                                                                                                                                                                                                                                                                                                                                                                                                                                                                                                                                                                                                                       |     |     |                                |           |        |
| 1                                                                                                            | Extended cluster  |       | left Crus I (7688), left VI (4023), left Crus II (3373), white matter (1741), right I-IV (580), left VIIIb (541), left dentate nuc. (474), left I-IV (472), vermal VIIIb (226), vermal IX (200), right interposed nuc. (163), vermal VIIIa (159), right dentate nuc. (92), left interposed nuc. (73), right V (70), left V (41), left IX (34), right fastigial nuc. (31), left VIIIa (30), vermal VI (9), right IX (9), vermal Crus I (8), left fastigial nuc. (8), vermal Crus II (2)                                                                                                                                                                                                                                |     |     |                                |           |        |
|                                                                                                              | Crus I            | Left  | -17                                                                                                                                                                                                                                                                                                                                                                                                                                                                                                                                                                                                                                                                                                                   | -78 | -25 | 20047                          | < 0.001   | 4010.8 |
|                                                                                                              | VI                | Left  | -25                                                                                                                                                                                                                                                                                                                                                                                                                                                                                                                                                                                                                                                                                                                   | -73 | -26 |                                | < 0.001   | 3912.9 |
|                                                                                                              | Crus I            | Left  | -41                                                                                                                                                                                                                                                                                                                                                                                                                                                                                                                                                                                                                                                                                                                   | -68 | -29 |                                | 0.001     | 3633.1 |
| 2                                                                                                            | Extended cluster  |       | right Crus I (1313), right VI (750), white matter (66)                                                                                                                                                                                                                                                                                                                                                                                                                                                                                                                                                                                                                                                                |     |     |                                |           |        |

|   |         |       |    |     |     |      |       |        |
|---|---------|-------|----|-----|-----|------|-------|--------|
|   | VI      | Right | 30 | -68 | -27 | 2129 | 0.015 | 1484.6 |
|   | VI      | Right | 25 | -73 | -22 |      | 0.018 | 1422.4 |
|   | Crus I  | Right | 45 | -65 | -27 |      | 0.019 | 1384.5 |
| 3 | Crus II | Right | 15 | -79 | -33 | 42   | 0.047 | 1079.1 |

**e) no-US post CS+ > no-US post CS- : extinction t-test, TFCE,  $p < 0.05$ , FWE corr.**

|   |        |      |     |     |     |     |       |        |
|---|--------|------|-----|-----|-----|-----|-------|--------|
| 1 | Crus I | Left | -14 | -72 | -35 | 273 | 0.016 | 1416.9 |
|---|--------|------|-----|-----|-----|-----|-------|--------|

---

445

446

447 Comparison of cerebellar areas related to the presentation, the prediction and the omission  
448 of the aversive stimulus

449 Conjunction analyses were performed to reveal areas of cerebellar activation which were  
450 common to the presentation, the prediction and the (unexpected) omission of the aversive  
451 US during acquisition (based on the three differential contrasts reported above). Conjunction  
452 analyses revealed common areas of activation in the cerebellar hemispheres primarily on the  
453 left (local maxima Crus I; testing global null hypotheses at a threshold of  $p < 0.05$  FWE  
454 corrected level without TFC enhancement) (**Fig. 4a**, see also **Supp. Table 2**). Additional  
455 common areas of cerebellar activation were present in the anterior and posterior vermis  
456 when considering the two contrasts related to US presentation and its unexpected omission  
457 only (**Supp. Fig. 3b**).

458 Next, we were interested whether the level of activations differed between the three  
459 differential contrasts of interest. Using the same second level model, the main effect of  
460 contrasts was calculated ( $F$ -test, contrast vector: [1 -1 0; 0 1 -1];  $p < 0.05$  FWE corrected  
461 without TFC enhancement). Significant differences were found in the left lobule Crus I (with  
462 a small extension into lobule VI) and a small cluster in the anterior vermis (local maximum  
463 lobule I-IV) (**Fig. 4b**, **Supp. Table 3**). This difference reflected a lower level of activation  
464 related to the prediction of the aversive stimulus compared to its presentation and  
465 unexpected omission (see small insert in **Fig. 4b**). Comparing any two out of the three  
466 contrasts at a time, revealed no significant difference in the level of activations comparing  
467 the omission and the prediction of the aversive stimulus, except a small cluster in the  
468 anterior vermis which was more prominent related to the omission of the US (**Supp. Fig. 3e**).  
469 The level of activations of the vermis and neighboring areas of the cerebellar hemispheres  
470 were significantly higher related to the experience of the US compared to its prediction and  
471 unexpected omission (**Supp. Fig. 3d,e**).



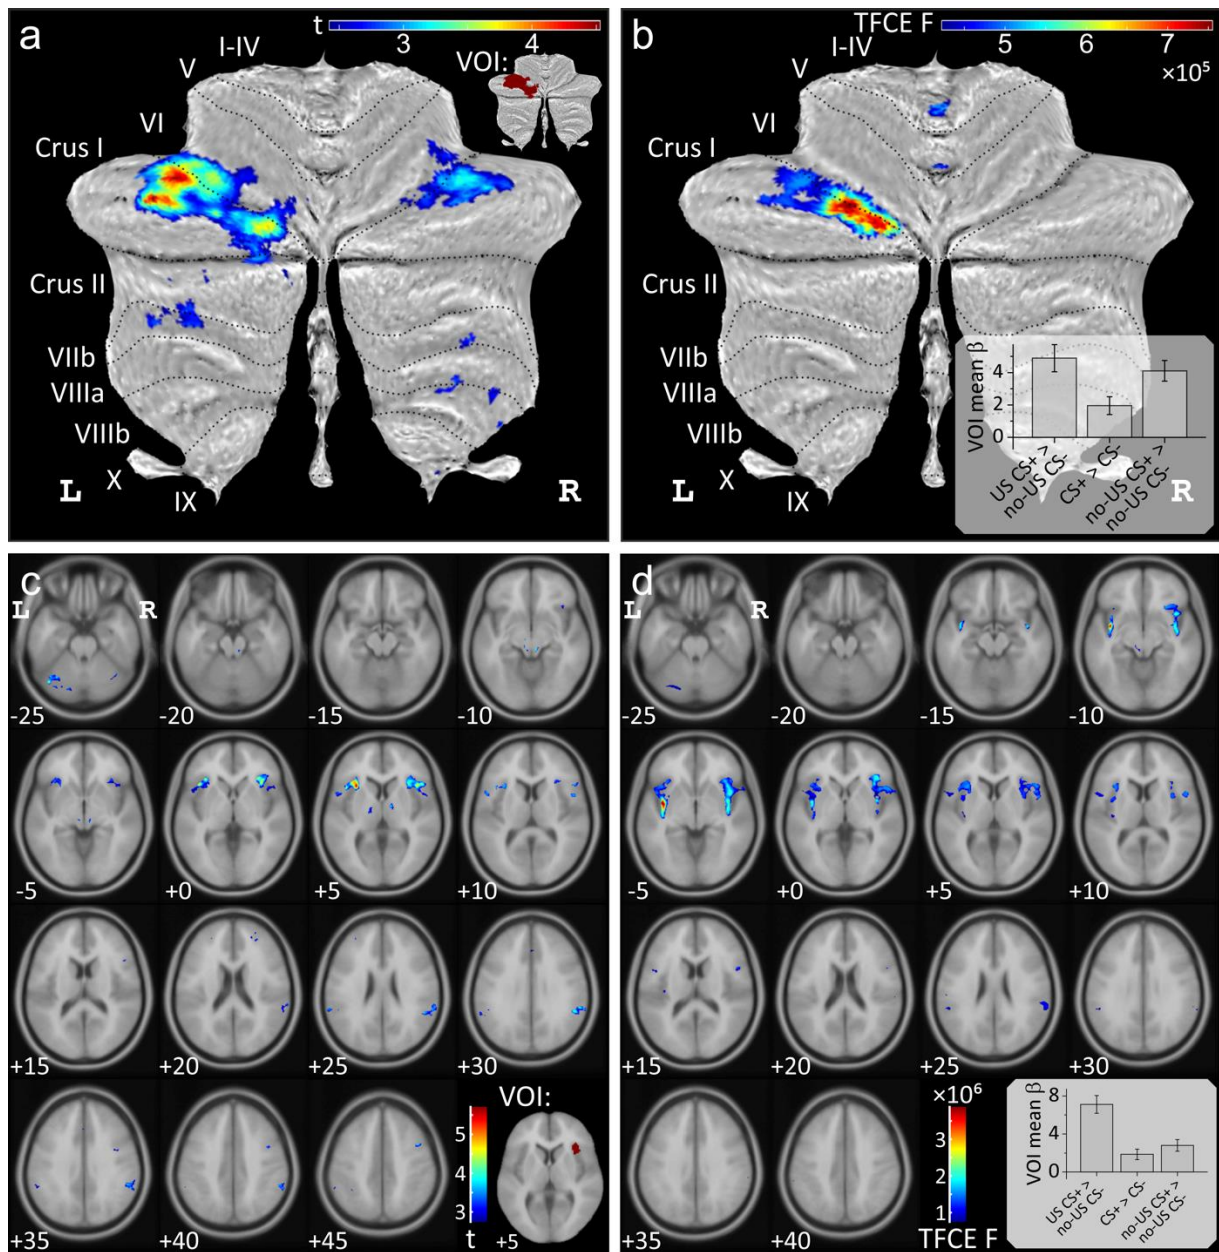

472

473 **Figure 4:** Conjunction analyses testing global null hypotheses (a,c) and analyses of  
 474 differences (b,d) between the three contrasts "US post CS+ > no-US post CS-", "CS+ > CS-"  
 475 and "no-US post CS+ > no-US post CS-" (shown in Fig. 3) during fear acquisition. Data in (a,b)  
 476 is shown in SUIT space and in (c,d) in MNI space. All contrasts displayed using FWE  
 477 correction ( $p < 0.05$ ), (b,d) using TFCE. Bar graphs display group mean  $\beta$  values for each  
 478 contrast considering the whole activation volume (error bars: standard error). Volumes of  
 479 interests (VOI) were defined based on conjunction analyses and are shown in the inserts:  
 480 cerebellar VOI (a) and insula VOI (c).

481 Mean  $\beta$  values related to each event (presentation of US, CS+, CS-, omission of US) compared  
482 to rest

483 Based on the conjunction analyses for the three contrasts of interest in acquisition, we  
484 defined a volume of interest (VOI) in the left cerebellar hemisphere (indicated in red in the  
485 insert in **Fig. 4a**). Mean  $\beta$  values were calculated for each event compared to rest within the  
486 VOI.

487 During acquisition, mean  $\beta$  values in CS+ trials (black triangles in **Fig. 4a**) were significantly  
488 higher compared to CS- trials (inverted gray triangles;  $F_{1,21} = 14.56$ ,  $p = 0.001$ ). The block  
489 (early vs. late) effect ( $F_{1,21} = 0.64$ ,  $p = 0.432$ ) and stimulus type by block interaction  
490 ( $F_{1,21} = 3.96$ ,  $p = 0.060$ ) effects were not significant. During extinction, mean  $\beta$  values  
491 declined in CS+ trials, and were no longer different between CS+ and CS- trials ( $F_{1,21} = 0.27$ ,  
492  $p = 0.610$ ). Block ( $F_{1,21} = 3.94$ ,  $p = 0.060$ ) and stimulus type by block interaction ( $F_{1,21} < 0.01$ ,  
493  $p = 0.973$ ) effects were not significant.

494 Mean  $\beta$  values related to US events were significantly higher in response to the presentation  
495 of the aversive US in paired CS+ trials (US post CS+; black diamonds in **Fig. 5a**) compared to  
496 the corresponding event in CS- trials (no-US post CS-; inverted black triangles) ( $F_{1,21} = 26.75$ ,  
497  $p < 0.001$ ). There were no significant block (early vs. late;  $F_{1,21} = 2.22$ ,  $p = 0.151$ ) or stimulus  
498 type by block interaction effects ( $F_{1,21} < 0.01$ ,  $p = 0.960$ ). Likewise, mean  $\beta$  values related to  
499 the unexpected omission of the US in CS+ trials (no-US post CS+; gray triangles) were  
500 significantly higher compared to the corresponding event in CS- trials in early ( $t_{21} = 4.38$ ,  
501  $p < 0.001$ ) and late acquisition phase ( $t_{21} = 6.73$ ,  $p < 0.001$ ). During extinction, mean  $\beta$  values  
502 declined, but remained significantly higher related to no-US post CS+ events compared to  
503 no-US post CS- events ( $F_{1,21} = 4.52$ ,  $p = 0.046$ ). The block effect (early vs. late;  $F_{1,21} = 8.326$ ,  
504  $p = 0.009$ ) was significant. The stimulus type by block interaction was not significant  
505 ( $F_{1,21} = 0.08$ ,  $p = 0.784$ ).

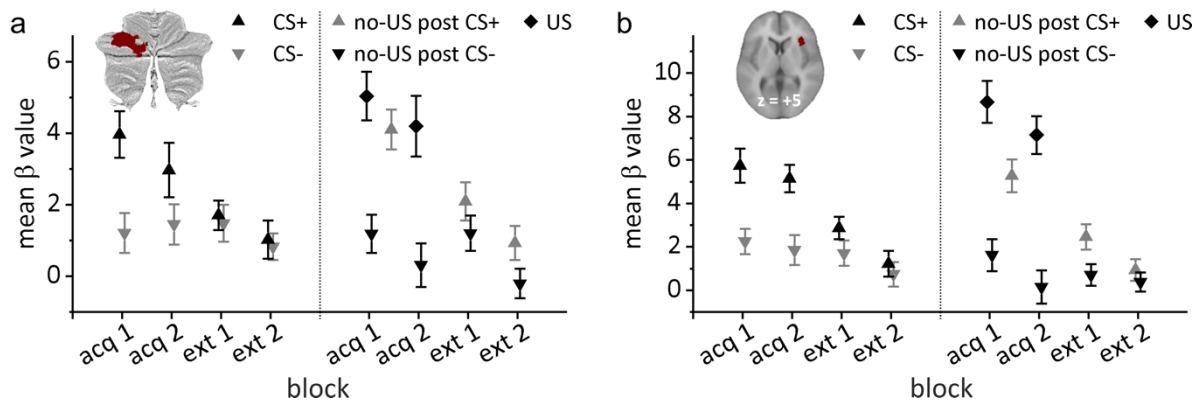

506  
 507 **Figure 5:** Group mean  $\beta$  values related to each event (presentation of US, CS+, CS-, omission  
 508 of US) compared to rest. **a)** Volume of interest (VOI) in the left cerebellar hemisphere; **b)** VOI  
 509 in the right insula. Error bars represent standard errors. hab = habituation, acq 1, acq 2 =  
 510 early and late acquisition, ext 1, ext 2 = early and late extinction.

511

#### 512 **PPI data: cerebello-cerebral interactions**

513 As described above, a VOI was defined in the lateral cerebellar cortex based on conjunction  
 514 analyses. Analyses of psychophysiological interactions (PPI) for the three contrasts of  
 515 interest were performed between this cerebellar VOI and the whole brain. PPIs are reported  
 516 which are significant at  $p < 0.05$  FWE corrected level after TFCE application. The most  
 517 prominent finding was significant modulation of the functional connectivity between the  
 518 cerebellum and occipital lobe during fear acquisition. There was no significant PPI found  
 519 during extinction.

520 PPI related to the presentation of the aversive stimulus. Considering the seed region in the  
 521 left cerebellar hemisphere, activation related to the presentation of the US (as revealed by  
 522 the contrast “US post CS+ > no-US post CS-“) showed increased functional connectivity with  
 523 striate and extrastriate visual areas (blue-green color code in **Fig. 6**; see also **Table 2**; local  
 524 maxima in the calcarine fissure and surrounding cortex (V1)). Additional areas of increased  
 525 functional connectivity were found in limbic areas (cingulum, parahippocampus). No  
 526 significant decreases of functional connectivity were found.

527 PPI related to the prediction of the aversive stimulus. Cerebellar activation in the  
 528 hemispherical seed region related to the prediction of the aversive stimulus (as revealed by  
 529 the contrast “CS+ > CS-“) showed increased functional connectivity with extrastriate visual



530 areas (local maxima in middle occipital lobe, lingual gyrus, fusiform gyrus; red-yellow color  
531 code in **Fig. 6; Table 2**). No significant decreases of functional connectivity were found.

532 PPI related to the (unexpected) omission of the aversive stimulus. Cerebellar activation in the  
533 in the hemispherical seed region related to the (unexpected) omission of the aversive US (as  
534 revealed by the contrast “no-US post CS+ > no-US post CS-“) showed no significant increases  
535 or decreases of functional connectivity.

536

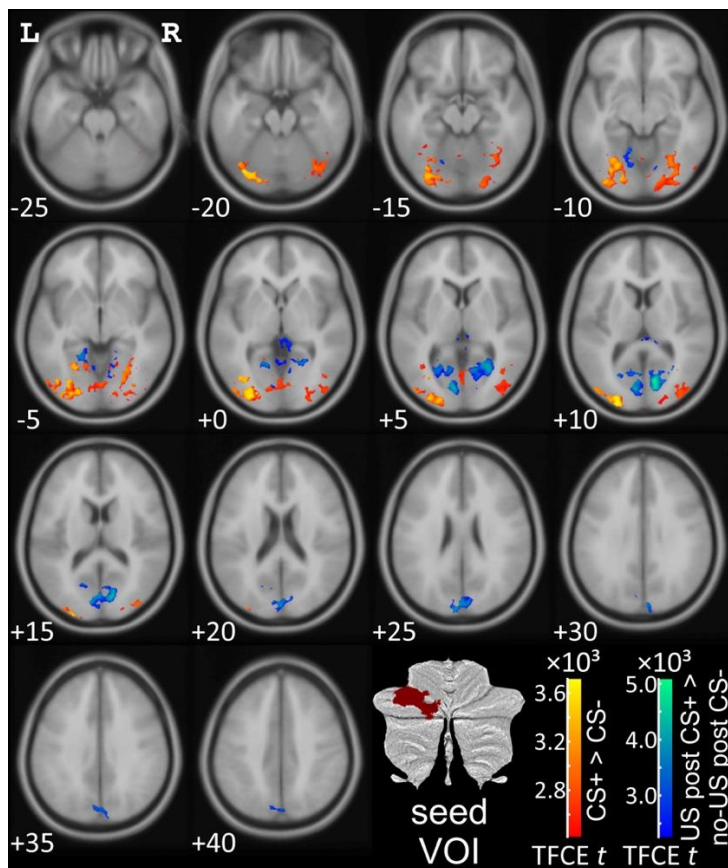

537

538 **Figure 6:** Psychophysiological interaction (PPI) analysis based on a seed region in the left  
539 lateral cerebellar cerebellum ( $p < 0.05$  FWE corrected level after TFCE application). L = left, R  
540 = right.

541 **Table 2:** Psychophysiological interactions (PPI) based on a seed region in the left lateral  
 542 cerebellum. Clusters of 20 mm<sup>3</sup> or larger are shown. Up to three maxima in each cluster are  
 543 shown separated by at least 8 mm.

| Index                                                                                                                                         | Location          | Side                                                                                                                                                                                                                                                                                                                                                                                                                                                                                                               | SUIT coordinates / mm |     |     | Cluster size / mm <sup>3</sup> | $p_{FWE}$ | TFCE   |
|-----------------------------------------------------------------------------------------------------------------------------------------------|-------------------|--------------------------------------------------------------------------------------------------------------------------------------------------------------------------------------------------------------------------------------------------------------------------------------------------------------------------------------------------------------------------------------------------------------------------------------------------------------------------------------------------------------------|-----------------------|-----|-----|--------------------------------|-----------|--------|
| <b>PPI (increased functional connectivity): acquisition, US post CS+ &gt; no-US post CS- t-test, TFCE, <math>p &lt; 0.05</math> FWE corr.</b> |                   |                                                                                                                                                                                                                                                                                                                                                                                                                                                                                                                    |                       |     |     |                                |           |        |
| 1                                                                                                                                             | Extended cluster  | right Calcarine (4607), left Calcarine (3955), left Cuneus (2921), left Lingual (1995), right Lingual (1903), outside GM (1632), right Cuneus (932), left Precuneus (424), vermal Lob. IV-V (323), left Lob. IV-V (193), left Lob. VI (141), left Occipital_Sup (117), right Thalamus (53), right Precuneus (47), left Thalamus (39), right Lob. IV-V (37), right Cingulum_Post (27), left Parietal_Sup (27), left Cingulum_Post (13), left ParaHippocampal (11), right Hippocampus (9), right ParaHippocampal (3) |                       |     |     |                                |           |        |
|                                                                                                                                               | Calcarine         | Right                                                                                                                                                                                                                                                                                                                                                                                                                                                                                                              | 11                    | -74 | 11  | 19409                          | 0.001     | 5080.1 |
|                                                                                                                                               | Calcarine         | Left                                                                                                                                                                                                                                                                                                                                                                                                                                                                                                               | -8                    | -80 | 7   |                                | 0.002     | 4220.7 |
|                                                                                                                                               | Calcarine         | Right                                                                                                                                                                                                                                                                                                                                                                                                                                                                                                              | 22                    | -58 | 3   |                                | 0.003     | 4102.5 |
| <b>PPI (increased functional connectivity): acquisition, CS+ &gt; CS- t-test, TFCE, <math>p &lt; 0.05</math> FWE corr.</b>                    |                   |                                                                                                                                                                                                                                                                                                                                                                                                                                                                                                                    |                       |     |     |                                |           |        |
| 1                                                                                                                                             | Extended cluster  | left Occipital_Mid (5908), left Lingual (4253), left Fusiform (2706), left Occipital_Inf (2297), outside GM (1491), left Lob. Crus I (645), right Lingual (616), left Calcarine (241), left Lob. VI (177), left Occipital_Sup (114), right Calcarine (99), left Precuneus (21), left Temporal_Mid (16), vermal Lob. IV-V (3)                                                                                                                                                                                       |                       |     |     |                                |           |        |
|                                                                                                                                               | Occipital_Mid     | Left                                                                                                                                                                                                                                                                                                                                                                                                                                                                                                               | -24                   | -98 | 10  | 18587                          | 0.007     | 3714.2 |
|                                                                                                                                               | Occipital_Mid     | Left                                                                                                                                                                                                                                                                                                                                                                                                                                                                                                               | -29                   | -89 | 0   |                                | 0.008     | 3634.5 |
|                                                                                                                                               | Fusiform          | Left                                                                                                                                                                                                                                                                                                                                                                                                                                                                                                               | -24                   | -71 | -8  |                                | 0.009     | 3568.4 |
| 2                                                                                                                                             | Extended cluster  | right Fusiform (3493), right Occipital_Mid (2820), right Lingual (2743), right Occipital_Inf (1068), outside GM (1040), right Temporal_Mid (411), right Occipital_Sup (329), right Cuneus (301), right Lob. Crus I (288), right Lob. VI (270), right Temporal_Inf (251), right Calcarine (151)                                                                                                                                                                                                                     |                       |     |     |                                |           |        |
|                                                                                                                                               | Fusiform          | Right                                                                                                                                                                                                                                                                                                                                                                                                                                                                                                              | 33                    | -79 | -7  | 13165                          | 0.018     | 3160.4 |
|                                                                                                                                               | Lingual           | Right                                                                                                                                                                                                                                                                                                                                                                                                                                                                                                              | 26                    | -62 | -6  |                                | 0.018     | 3133.8 |
|                                                                                                                                               | Fusiform          | Right                                                                                                                                                                                                                                                                                                                                                                                                                                                                                                              | 24                    | -71 | -6  |                                | 0.02      | 3088.5 |
| 3                                                                                                                                             | Paracentrallobule | Left                                                                                                                                                                                                                                                                                                                                                                                                                                                                                                               | -2                    | -38 | 69  | 394                            | 0.018     | 3158.1 |
| 4                                                                                                                                             | Extended cluster  | vermal Lob. IV-V (92), left Lob. IV-V (35), vermal Lob. VI (12), left Lob. VI (8)                                                                                                                                                                                                                                                                                                                                                                                                                                  |                       |     |     |                                |           |        |
|                                                                                                                                               | Lob. VI           | Vermal                                                                                                                                                                                                                                                                                                                                                                                                                                                                                                             | -1                    | -64 | -10 | 147                            | 0.04      | 2580.3 |
|                                                                                                                                               | Lob. IV-V         | Vermal                                                                                                                                                                                                                                                                                                                                                                                                                                                                                                             | 1                     | -56 | -4  |                                | 0.05      | 2417.9 |
| 5                                                                                                                                             | Extended cluster  | left Fusiform (248), left Occipital_Inf (6), outside GM (1), left Temporal_Inf (1)                                                                                                                                                                                                                                                                                                                                                                                                                                 |                       |     |     |                                |           |        |
|                                                                                                                                               | Fusiform          | Left                                                                                                                                                                                                                                                                                                                                                                                                                                                                                                               | -33                   | -48 | -13 | 256                            | 0.042     | 2541.9 |
|                                                                                                                                               | Fusiform          | Left                                                                                                                                                                                                                                                                                                                                                                                                                                                                                                               | -41                   | -58 | -14 |                                | 0.042     | 2520.3 |
| 6                                                                                                                                             | Extended cluster  | right Lingual (173), right Lob. IV-V (14)                                                                                                                                                                                                                                                                                                                                                                                                                                                                          |                       |     |     |                                |           |        |
|                                                                                                                                               | Lingual           | Right                                                                                                                                                                                                                                                                                                                                                                                                                                                                                                              | 17                    | -56 | -4  | 187                            | 0.044     | 2483.6 |
|                                                                                                                                               | Lingual           | Right                                                                                                                                                                                                                                                                                                                                                                                                                                                                                                              | 10                    | -60 | -4  |                                | 0.045     | 2475.6 |
| 7                                                                                                                                             | Lingual           | Right                                                                                                                                                                                                                                                                                                                                                                                                                                                                                                              | 17                    | -52 | 2   | 65                             | 0.047     | 2455.3 |

544

545 **Whole brain analysis**

546 Although the focus of the study was on the cerebellum, exploratory whole brain fMRI  
547 analysis was also performed. Data is presented at  $p < 0.05$  FWE corrected level after TFCE  
548 application. Most prominent activation was observed within the insula (**Fig. 3**). Activation of  
549 other limbic areas was observed primarily related to the presentation of the aversive  
550 stimulus. Similar to cerebellar activation, prominent activation of the insula was observed  
551 not only to the prediction of the upcoming US but also related to its unexpected omission  
552 during acquisition trials. Cerebral activations vanished during extinction trials (at  $p < 0.05$   
553 FWE corrected level after TFCE).

554 Cerebral activation related to the presentation of the aversive stimulus [contrast  
555 “US post CS+ > no-US post CS-”]: Most prominent activations were found in the insula  
556 bilaterally (**Fig. 3d**). Additional differential activations were present in the anterior and  
557 middle cingulate gyrus, the amygdala, supplementary motor area (SMA), supramarginal and  
558 superior temporal gyrus bilaterally, frontal inferior gyrus and cuneus (summarized in **Supp.**  
559 **Table 5**).

560 Cerebral related to the prediction of the aversive stimulus [contrast “CS+ > CS-”]: During  
561 acquisition, cerebral activation related to the CS+ was significantly higher compared to the  
562 CS- in the more anterior parts of the insula bilaterally (**Fig. 3e; Supp. Table 5**). Additional  
563 differential activation was present in the right SMA and middle cingulate gyrus. During  
564 extinction, no significant fMRI activation was observed.

565 Cerebral activation related to the omission of the aversive stimulus [contrast “no-  
566 US post CS+ > no-US post CS-”]: During acquisition, significant differential activation related  
567 to the (unexpected) omission of the US was found in more anterior parts of the insula  
568 bilaterally (**Fig. 3e, Supp. Table 5**). Additional activation was found bilaterally in the SMA,  
569 anterior and medial cingulate and right supramarginal cortex. During extinction, no  
570 significant activations were observed.

571 Comparison of cerebellar areas related to the presentation, the prediction and the omission  
572 of the aversive stimulus

573 Conjunction analyses revealed that the more anterior parts of the insula bilaterally were  
574 activated in the three contrasts of interest (testing the global null hypotheses at a threshold

575 of  $p < 0.05$  FWE corrected level without TFC enhancement) (**Fig. 4c**, see also **Supp. Table 2**).  
576 In the anterior, but also posterior parts of the insula the level of activations differed between  
577 the three differential contrasts of interest ( $F$ -tests;  $p < 0.05$  FWE corrected without TFC  
578 enhancement; **Fig. 4d, Supp. Table 3**). This difference reflected a higher level of activation  
579 related to the experience of the aversive stimulus compared to its prediction and  
580 unexpected omission (see small insert in **Fig. 4d**).

581 Mean  $\beta$ -values in the insula related to each event (presentation of US, CS+, CS-, omission of  
582 US) compared to rest

583 A VOI was defined in the insula based on conjunction analyses considering the three  
584 contrasts of interest as described above (see insert in **Fig. 4c**). We choose the right insula  
585 because the left cerebellar hemisphere is connected with the right cerebral hemisphere.

586 During acquisition, mean  $\beta$  values in CS+ trials (black triangles in **Fig. 5b**) were significantly  
587 higher than in CS- trials (inverted gray triangles;  $F_{1,21} = 17.97$ ,  $p < 0.001$ ). The block effect  
588 (early vs. late;  $F_{1,21} = 1.14$ ,  $p = 0.298$ ) and stimulus type by block interaction ( $F_{1,21} = 0.05$ ,  
589  $p = 0.825$ ) effects were not significant. During extinction, mean  $\beta$  values in CS+ trials  
590 declined. The block effect was significant ( $F_{1,21} = 6.69$ ,  $p = 0.017$ ). Stimulus type ( $F_{1,21} = 1.64$ ,  
591  $p = 0.215$ ) and stimulus type by block interaction effects ( $F_{1,21} = 0.51$ ,  $p = 0.483$ ) were not  
592 significant.

593 Mean  $\beta$  values in the VOI in the right insula were significantly higher in response to the  
594 presentation of the aversive US in paired CS+ trials (US post CS+; black diamonds in **Fig. 5b**)  
595 compared to the corresponding event in CS- trials (no-US post CS-; inverted black triangles)  
596 ( $F_{1,21} = 38.09$ ,  $p < 0.001$ ). The block effect was significant (early vs. late;  $F_{1,21} = 9.05$ ,  
597  $p = 0.007$ ). The stimulus type by block interaction was not significant ( $F_{1,21} < 0.01$ ,  $p = 0.947$ ).  
598 Likewise, mean  $\beta$  values related to the unexpected omission of the US in CS+ trials (no-US  
599 post CS+; gray triangles) were significantly higher compared to the CS- trials in early  
600 ( $t_{21} = 4.30$ ,  $p < 0.001$ ) and late acquisition ( $t_{21} = 5.09$ ,  $p < 0.001$ ). During extinction, mean  $\beta$   
601 values at the time of the presentation of the US in CS+ trials declined, but remained higher  
602 compared to CS- trials in early extinction. Stimulus type effect was significant ( $F_{1,21} = 5.60$ ,  
603  $p = 0.028$ ). Block ( $F_{1,21} = 3.95$ ,  $p = 0.060$ ) and stimulus type by block interaction ( $F_{1,21} = 0.08$ ,  
604  $p = 0.784$ ) effects were not significant.

## 605 **Discussion**

606 Cerebellar activation was observed related to the learned association of the CS and the  
607 aversive US confirming previous results (Fischer et al., 2000; Frings et al., 2002; Ploghaus et  
608 al., 1999). Most importantly, marked cerebellar activation was found also during the  
609 unexpected omission of the unpleasant event and disappeared during extinction trials (in  
610 which the omission became expected). These findings support the hypothesis that the  
611 cerebellum acts as or is part of a predictive device not only in the motor but also in the  
612 emotional domain. In addition to the cerebellum, exploratory whole brain analysis showed  
613 very similar patterns of activation in the insula, which has been shown to be involved in  
614 aversive prediction error processing by others (Geuter et al., 2017; Li et al., 2011). Thus, first  
615 evidence was found that the cerebellum is part of a more extended neural network  
616 processing prediction errors in learned emotional responses. The discussion will focus on the  
617 cerebellar findings, which were also accompanied by changes in functional connectivity  
618 predominantly with visual cortices. Hence, one cerebellar role in emotional control may be  
619 to modulate processing of fear-related sensory information.

### 620 **Cerebellar activation during the presentation and the prediction of aversive events**

621 Cerebellar activation during the presentation and the prediction of aversive events is in good  
622 accordance with the literature (Dimitrova et al., 2003; Lange et al., 2015; Maschke et al.,  
623 2003; Ploghaus et al., 1999). In a seminal study, Ploghaus et al. (1999) reported that distinct,  
624 but closely adjacent cerebellar areas were related to the experience and the prediction of  
625 pain. In accordance, we found activation of the anterior cerebellum with a maximum in the  
626 cerebellar vermis related to presentation of the aversive stimulus. Different to Ploghaus et  
627 al. (1999), however, cerebellar activation related to the experience of the US showed a  
628 significant extension to the posterolateral cerebellum (including lobules Crus I and VI) and  
629 overlapped with the area related to the prediction of the aversive stimulus. Furthermore,  
630 the level of activation in the posterolateral cerebellum was more related to the experience  
631 of the aversive stimulus compared to its prediction. Likewise, other fMRI studies have  
632 reported that aversive stimuli result in more widespread cerebellar activations of both  
633 anteromedial and posterolateral areas (painful electrical stimulation of the feet: Dimitrova et  
634 al., 2003; airpuffs directed to the eye: Maschke et al., 2003; Moulton et al., 2010). Responses

635 to aversive stimuli are complex and involve autonomic, sensorimotor, and higher-order  
636 emotional reactions. Parts of the vermis are known to contribute to autonomic functions  
637 (Apps and Strata, 2015 for reviews; Apps et al., 2018), the anterior lobe, part of lobule VI and  
638 lobule VIII to sensorimotor functions, and lobules Crus I and II to cognitive functions (King et  
639 al., 2018; Stoodley and Schmahmann, 2018). Thus, different parts of the cerebellum likely  
640 contribute to the various aspects involved in processing of aversive stimuli (Moulton et al.,  
641 2010).

642 Very similar to our findings, a more recent fMRI study also reported an overlap of cerebellar  
643 areas related to the experience and prediction of painful stimuli in Crus I and lobule VI of the  
644 posterolateral cerebellum (Welman et al., 2018). Nevertheless, we suggest a different  
645 interpretation of the data than Ploghaus and colleagues (1999): Rather than reflecting a  
646 dissociation between the experience and the prediction of unpleasant events, midline parts  
647 of the cerebellum are likely involved in autonomic processes, and posterolateral parts of the  
648 cerebellum in higher-order emotional processes related to the experience and prediction of  
649 potentially harmful stimuli. The known motor areas also likely contribute to this picture.  
650 Depending on stimulus intensity participants may withdraw their hand or at least prepare a  
651 hand movement. In fact, early animal, but also human cerebellar lesion studies highlight the  
652 involvement of the cerebellar vermis in the conditioning of autonomic fear responses (Apps  
653 and Strata, 2015 for reviews; Apps et al., 2018; Sacchetti et al., 2002; Supple and Leaton,  
654 1990; Supple and Kapp, 1993). For example, Maschke et al. (2002) found that fear-  
655 conditioned bradycardia was impaired in patients with lesions of the cerebellar midline but  
656 not the lateral cerebellar hemispheres. On the other hand, activation of the posterolateral  
657 cerebellar hemisphere is very common in human fear conditioning fMRI studies (Lange et al.,  
658 2015). Given the known reciprocal connections of the posterolateral cerebellum and its  
659 output nuclei, the dentate nuclei, with the prefrontal cortex (Middleton and Strick, 1994;  
660 Middleton and Strick, 2000), lateral activations may reflect the more cognitive aspects of  
661 emotional processing. In the present study, the focus of activation was within Crus I with  
662 some extension into lobule VI. Although it cannot be excluded that part of the activation is  
663 related to the preparation or subliminal execution of a withdrawal movement, motor-  
664 related processes are unlikely to explain the bulk of posterolateral activation. Hand and  
665 finger movements result in fMRI activation of ipsilateral lobule V, with additional activation

666 of lobule VI bilaterally in more complex movements (King et al., 2018; Schlerf et al., 2010).  
667 Although some extension to Crus I has been observed in the latter, movements never result  
668 in activations primarily of Crus I. Rather, focus of activation is always on lobules V and VI,  
669 which was clearly not the case in the present study. Of note, preparation and execution of  
670 movements have been found to activate the same cerebellar areas (Cui et al., 2000).  
671 The present findings agree with the classic view that prediction depends on activity in the  
672 same networks that process the actual experience (e.g. James, 1892), at least at the level of  
673 the cerebellum. Recent single-cell recording studies within the cerebellar cortex in monkeys  
674 are also in line with this assumption: Both simple and complex spike firing rates at the same  
675 Purkinje cell encode movement kinematics and sensory feedback, but also motor predictions  
676 (Popa et al., 2012; Streng et al., 2017a; Streng et al., 2017b).  
677 Based on animal and human lesion data, vermal activation is to be expected related to the  
678 prediction of the aversive stimulus. A recent fMRI meta-analysis indeed showed activations  
679 of both the cerebellar hemispheres and the vermis in fear conditioning paradigms in healthy  
680 humans (Lange et al., 2015). This was, however, neither the case in the present study nor in  
681 the study by Ploghaus and colleagues (1999). Because participants were instructed about the  
682 CS-US contingencies to a certain degree in both studies, the cognitive component may have  
683 had the strongest impact on the fMRI data.  
684 Ploghaus and colleagues (1999) reported a similar dissociation for the experience and the  
685 prediction of pain in posterior and anterior parts of the insula, respectively. In the present  
686 study, we also found activation related to the US in the posterior insula, and activation  
687 related to the CS+ (and therefore prediction of the US) in more anterior parts. Very similar to  
688 our cerebellar findings, however, US-related activation extended into the more anterior  
689 insula and overlapped with CS+ related activations. Again, we hypothesize that this is not a  
690 dissociation between experience and prediction but reflects different functional aspects of  
691 processing of potentially harmful stimuli. For example, Frot et al. (2014) suggested that  
692 posterior parts of the insula may be more important in the evaluation of the intensity and  
693 localization of an aversive stimulus, whereas the anterior insula may process the emotional  
694 reaction to the stimulus. However, as yet, the anterior insula, but not the posterior insula  
695 has been shown to be involved in processing predictions of aversive events (Geuter et al.,



696 2017). Notwithstanding, this concept may also be extended to other brain areas, e.g. the  
697 medial and anterior cingulate cortex (Vogt, 2014). In the present study, however, no other  
698 cerebral regions showed significant activations related to the prediction of the aversive  
699 stimulus in the whole brain analysis using a conservative statistical threshold.

#### 700 **Cerebellar activation during the unexpected omission of predicted aversive events**

701 We found cerebellar activation related to the predicted occurrence of an aversive US. More  
702 prominent cerebellar activations, however, were observed during the unexpected omission  
703 of the unpleasant event. Cerebellar activation was most marked in the posterolateral  
704 cerebellum (lobules Crus I, VI), but additional activations were also present in the vermis.  
705 Importantly, cerebellar activation vanished during extinction trials, during which the  
706 omission of the US became expected. These findings support the hypothesis that the  
707 cerebellum is involved in the encoding and/or processing of prediction errors. The present  
708 findings are supported by earlier findings (Ploghaus et al., 2000) reporting activations of the  
709 posterolateral cerebellar hemisphere in the very first extinction trial in an associative  
710 learning task using painful heat stimuli as US. Our findings are also very similar to findings in  
711 a recent fMRI study on the cerebellar contributions to language (Moberget et al., 2014):  
712 Activation of the posterolateral cerebellum (Crus I and II) was related to the predictability of  
713 upcoming words in a sentence (e.g., two plus two is *four*). Similar to the present findings,  
714 prominent cerebellar activation was also observed when this prediction was violated (e.g.,  
715 two plus two is *apple*). In the sensorimotor domain, fMRI data in humans also show  
716 cerebellar activation related to the unexpected omission of an expected sensory stimulus  
717 (Ramnani et al., 2000; Schlerf et al., 2012).

718 Based on theoretical models it has long been assumed that error information is sent to the  
719 cerebellar cortex via the climbing fibers (Albus, 1971; Marr, 1969). Climbing fibers have been  
720 shown to signal the unexpected occurrence and the unexpected omission of the airpuff-US  
721 in eyeblink conditioning in mice and rabbits (see Ohmae and Medina, 2015, for a recent  
722 study): Whereas the unexpected occurrence leads to an increase of climbing fiber activity,  
723 the unexpected omission results in a decrease. Because the fMRI signal is thought to reflect  
724 synaptic activity (Lauritzen et al., 2012), decrease of climbing fiber input cannot explain the  
725 observed increased fMRI signal in the cerebellar cortex during US omission. Prediction



726 errors, however, may not only be signaled by the climbing fiber system. There is also  
727 evidence that mossy fibers play a role (Popa et al., 2017; Streng et al., 2018). Furthermore,  
728 the role of the cerebellum may go beyond the processing of sensory predictions and sensory  
729 prediction errors and may include reward predictions and prediction errors (Carta et al.,  
730 2019; Wagner et al., 2017). Wagner et al. (2017) found granule cells that responded  
731 preferentially to reward, to reward omission and reward anticipation, a function commonly  
732 ascribed to the dopaminergic system (Schultz et al., 1997; Schultz, 2017). Importantly,  
733 reward omission granule cells were significantly more frequent than reward cells. In addition  
734 to sensory and reward prediction errors, the cerebellum may be involved in prediction of  
735 punishment and punishment prediction errors. As outlined in the introduction, several brain  
736 areas are likely involved in the processing of predictions and prediction errors in associative  
737 fear learning. As yet, it is unknown where prediction errors of learned fear responses are  
738 encoded (Tovote et al., 2015). Because there is some experimental evidence that sensory  
739 prediction errors are encoded in the cerebellar cortex and nuclei (Brooks et al., 2015; Ohmae  
740 and Medina, 2015; Popa and Ebner, 2018), the cerebellum is a likely candidate. However,  
741 this issue is far from being settled and extracerebellar areas may also play a role.

#### 742 **Changes in connectivity between the cerebellum and visual cortex**

743 Functional connectivity of the cerebellum was increased with visual cortical areas when  
744 comparing CS+ with CS- trials and with limbic areas during presentation of the US, but not  
745 during its prediction. Likewise, Lithari et al. (2016) found that visual cortex processing plays a  
746 more central role and that limbic areas become functionally decoupled in a fear conditioning  
747 paradigm. Increased connectivity between the cerebellum and visual cortex suggests that  
748 the cerebellum contributes to the known enhancement of the perception of visual stimuli  
749 during fear conditioning (Petro et al., 2017).

750 However, at first sight, increased connectivity between the cerebellum and visual cortex is  
751 unexpected. In monkeys, the primary visual cortex has no known afferent connections with  
752 the cerebellum (Glickstein et al., 1994; Schmahmann and Pandya, 1997). Likewise, resting  
753 state fMRI revealed no functional connectivity between the cerebellum and primary visual  
754 cortex in a large study population (Buckner et al., 2011). Rather, the cerebellum receives  
755 dense afferent connections from the dorsal stream of parietal lobe visual areas (Glickstein,

2000; Schmahmann and Pandya, 1997) and is known to increase visual perception of movements (e.g., Christensen et al., 2014; Handel et al., 2009). The influence of the cerebellum on the perception of fear-conditioned visual stimuli may be indirect: Enhanced processing of fear conditioned visual stimuli in the visual cortex has been shown to be under the control of cortical structures, in particular the middle frontal gyrus (MFG; Petro et al., 2017). Bidirectional cerebello-frontal connections are known for the frontal eye field and the dorsolateral prefrontal cortex, which play an important role in attention (Middleton and Strick, 2001). Possibly, the cerebellum may help to increase selective attention to the CS.

## 764 **Conclusions**

765 The most important present finding is the pronounced cerebellar activation during the  
766 unexpected omission of a predicted aversive stimulus. This cerebellar activation is best  
767 explained by the generation or further processing of prediction errors. As expected,  
768 cerebellar activation was also found during the prediction of aversive stimuli. These findings  
769 support the hypothesis that the cerebellum is of general importance for predictive control  
770 including the emotional domain. The cerebellum has to be added to the more extended  
771 neural network involved in processing of aversive predictions and prediction errors.

## 772 **Acknowledgments**

773 The authors like to thank M. Craske for her valuable advice and fruitful discussions, J.  
774 Marquez for his support using the MP2RAGE sequence, B. Poser for his work on the SMS-EPI  
775 sequence, T. Otto for his work on SCR analysis, and B. Brol for work on the cerebellar masks.  
776 This work was supported by a grant from the German Research Foundation (DFG; project  
777 number 316803389 – SFB 1280) to D.T. and H.H.Q. (subproject A05), C.J.M. (subproject A09),  
778 and U.B. (subproject A11).

779

## 780 **References**

- 781 Albus, J.S., 1971. A theory of cerebellar function. *Mathematical Biosciences*. 10, 25-61.
- 782 Apps, R., Strata, P., 2015. Neuronal circuits for fear and anxiety - the missing link. *Nat Rev*  
783 *Neurosci*. 16, 642.
- 784 Apps, R., et al., 2018. Cerebellar modules and their role as operational cerebellar processing  
785 units. *Cerebellum*. Epub ahead of print.
- 786 Atlas, L.Y., et al., 2016. Instructed knowledge shapes feedback-driven aversive learning in  
787 striatum and orbitofrontal cortex, but not the amygdala. *Elife*. 5, e15192.
- 788 Badura, A., et al., 2018. Normal cognitive and social development require posterior  
789 cerebellar activity. *Elife*. 7.
- 790 Bastian, A.J., 2006. Learning to predict the future: the cerebellum adapts feedforward  
791 movement control. *Curr Opin Neurobiol*. 16, 645-9.
- 792 Bazin, P.L., et al., 2014. A computational framework for ultra-high resolution cortical  
793 segmentation at 7 Tesla. *Neuroimage*. 93, 201-9.
- 794 Blatt, G.J., Oblak, A.L., Schmahmann, J.D., 2013. Cerebellar connections with limbic circuits:  
795 anatomy and functional implications. In: *Handbook of the Cerebellum and Cerebellar*  
796 *Disorders*. Vol., M. Manto, J.D. Schmahmann, F. Rossi, D.L. Gruol, N. Koibuchi, eds.  
797 Springer Netherlands, Dordrecht, pp. 479-96.
- 798 Blechert, J., et al., 2008. When two paradigms meet: Does evaluative learning extinguish in  
799 differential fear conditioning? *Learning and Motivation*. 39, 58-70.
- 800 Boll, S., et al., 2013. Separate amygdala subregions signal surprise and predictiveness during  
801 associative fear learning in humans. *Eur J Neurosci*. 37, 758-67.
- 802 Boucsein, W., 2012. *Electrodermal activity*, Vol., Springer, New York.
- 803 Brooks, J.X., Carriot, J., Cullen, K.E., 2015. Learning to expect the unexpected: rapid updating  
804 in primate cerebellum during voluntary self-motion. *Nat Neurosci*. 18, 1310-7.
- 805 Buckner, R.L., et al., 2011. The organization of the human cerebellum estimated by intrinsic  
806 functional connectivity. *J Neurophysiol*. 106, 2322-45.

- 807 Caligiore, D., et al., 2017. Consensus paper: towards a systems-level view of cerebellar  
808 function: the interplay between cerebellum, basal ganglia, and cortex. *Cerebellum*.  
809 16, 203-29.
- 810 Carta, I., et al., 2019. Cerebellar modulation of the reward circuitry and social behavior.  
811 *Science*. 363, eaav0581.
- 812 Cauley, S.F., et al., 2014. Interslice leakage artifact reduction technique for simultaneous  
813 multislice acquisitions. *Magn Reson Med*. 72, 93-102.
- 814 Christensen, A., et al., 2014. An intact action-perception coupling depends on the integrity of  
815 the cerebellum. *J Neurosci*. 34, 6707-16.
- 816 Cui, S.Z., et al., 2000. Both sides of human cerebellum involved in preparation and execution  
817 of sequential movements. *Neuroreport*. 11, 3849-53.
- 818 Diedrichsen, J., 2006. A spatially unbiased atlas template of the human cerebellum.  
819 *Neuroimage*. 33, 127-38.
- 820 Diedrichsen, J., Zotow, E., 2015. Surface-based display of volume-averaged cerebellar  
821 imaging data. *PLoS One*. 10, e0133402.
- 822 Dimitrova, A., et al., 2003. Cerebellar responses evoked by nociceptive leg withdrawal reflex  
823 as revealed by event-related fMRI. *J Neurophysiol*. 90, 1877-86.
- 824 Ernst, T.M., et al., 2017. Modulation of 7 T fMRI signal in the cerebellar cortex and nuclei  
825 during acquisition, extinction, and reacquisition of conditioned eyeblink responses.  
826 *Hum Brain Mapp*. 38, 3957-74.
- 827 Fischer, H., et al., 2000. Fear conditioning and brain activity: a positron emission tomography  
828 study in humans. *Behav Neurosci*. 114, 671-80.
- 829 Frings, M., et al., 2002. Involvement of the human cerebellum in fear-conditioned  
830 potentiation of the acoustic startle response: a PET study. *Neuroreport*. 13, 1275-8.
- 831 Friston, K.J., et al., 1997. Psychophysiological and modulatory interactions in neuroimaging.  
832 *Neuroimage*. 6, 218-29.
- 833 Frot, M., Faillenot, I., Mauguiere, F., 2014. Processing of nociceptive input from posterior to  
834 anterior insula in humans. *Hum Brain Mapp*. 35, 5486-99.

- 835 Gallichan, D., Marques, J.P., 2017. Optimizing the acceleration and resolution of three-  
836 dimensional fat image navigators for high-resolution motion correction at 7T. *Magn*  
837 *Reson Med.* 77, 547-58.
- 838 Geuter, S., et al., 2017. Functional dissociation of stimulus intensity encoding and predictive  
839 coding of pain in the insula. *Elife.* 6, e24770.
- 840 Glickstein, M., et al., 1994. Visual pontocerebellar projections in the macaque. *J Comp*  
841 *Neurol.* 349, 51-72.
- 842 Glickstein, M., 2000. How are visual areas of the brain connected to motor areas for the  
843 sensory guidance of movement? *Trends Neurosci.* 23, 613-7.
- 844 Glover, G.H., Li, T.Q., Ress, D., 2000. Image-based method for retrospective correction of  
845 physiological motion effects in fMRI: RETROICOR. *Magn Reson Med.* 44, 162-7.
- 846 Handel, B., Thier, P., Haarmeier, T., 2009. Visual motion perception deficits due to cerebellar  
847 lesions are paralleled by specific changes in cerebro-cortical activity. *J Neurosci.* 29,  
848 15126-33.
- 849 Holland, P.C., Schiffino, F.L., 2016. Mini-review: Prediction errors, attention and associative  
850 learning. *Neurobiol Learn Mem.* 131, 207-15.
- 851 Holmes, G., 1908. A form of familial degeneration of the cerebellum. *Brain.* 30, 466-89.
- 852 James, W., 1892. *Text-book of Psychology, Vol.*, Macmillan, London.
- 853 King, M., et al., 2018. A multi-domain task battery reveals functional boundaries in the  
854 human cerebellum. *bioRxiv.*
- 855 Lange, I., et al., 2015. The anatomy of fear learning in the cerebellum: a systematic meta-  
856 analysis. *Neurosci Biobehav Rev.* 59, 83-91.
- 857 Lauritzen, M., et al., 2012. Neuronal inhibition and excitation, and the dichotomic control of  
858 brain hemodynamic and oxygen responses. *Neuroimage.* 62, 1040-50.
- 859 Lesage, E., et al., 2012. Cerebellar rTMS disrupts predictive language processing. *Curr Biol.*  
860 22, R794-R5.
- 861 Lesage, E., Hansen, P.C., Miall, R.C., 2017. Right lateral cerebellum represents linguistic  
862 predictability. *J Neurosci.* 37, 6231-41.

- 863 Li, J., et al., 2011. Differential roles of human striatum and amygdala in associative learning.  
864 Nat Neurosci. 14, 1250-2.
- 865 Li, S.S., McNally, G.P., 2014. The conditions that promote fear learning: prediction error and  
866 Pavlovian fear conditioning. Neurobiol Learn Mem. 108, 14-21.
- 867 Lithari, C., Moratti, S., Weisz, N., 2016. Limbic areas are functionally decoupled and visual  
868 cortex takes a more central role during fear conditioning in humans. Sci Rep. 6,  
869 29220.
- 870 Marques, J.P., et al., 2010. MP2RAGE, a self bias-field corrected sequence for improved  
871 segmentation and T1-mapping at high field. Neuroimage. 49, 1271-81.
- 872 Marr, D., 1969. A theory of cerebellar cortex. J Physiol. 202, 437-70.
- 873 Maschke, M., et al., 2002. Fear conditioned changes of heart rate in patients with medial  
874 cerebellar lesions. J Neurol Neurosurg Psychiatry. 72, 116-8.
- 875 Maschke, M., et al., 2003. Cerebellar representation of the eyeblink response as revealed by  
876 PET. Neuroreport. 14, 1371-4.
- 877 McCormick, D.A., Thompson, R.F., 1984. Cerebellum: essential involvement in the classically  
878 conditioned eyelid response. Science. 223, 296-9.
- 879 Miall, R.C., et al., 1993. Is the cerebellum a smith predictor? J Mot Behav. 25, 203-16.
- 880 Miall, R.C., Galea, J., 2016. Cerebellar damage limits reinforcement learning. Brain. 139, 4-7.
- 881 Middleton, F.A., Strick, P.L., 1994. Anatomical evidence for cerebellar and basal ganglia  
882 involvement in higher cognitive function. Science. 266, 458-61.
- 883 Middleton, F.A., Strick, P.L., 2000. Basal ganglia and cerebellar loops: motor and cognitive  
884 circuits. Brain Res Brain Res Rev. 31, 236-50.
- 885 Middleton, F.A., Strick, P.L., 2001. Cerebellar projections to the prefrontal cortex of the  
886 primate. J Neurosci. 21, 700-12.
- 887 Moberget, T., et al., 2014. Generalized role for the cerebellum in encoding internal models:  
888 evidence from semantic processing. J Neurosci. 34, 2871-8.
- 889 Moulton, E.A., et al., 2010. The cerebellum and pain: passive integrator or active  
890 participator? Brain Res Rev. 65, 14-27.

- 891 Mumford, J.A., 2012. A power calculation guide for fMRI studies. *Soc Cogn Affect Neurosci.*  
892 7, 738-42.
- 893 Ohmae, S., Medina, J.F., 2015. Climbing fibers encode a temporal-difference prediction error  
894 during cerebellar learning in mice. *Nat Neurosci.* 18, 1798-803.
- 895 Oldfield, R.C., 1971. The assessment and analysis of handedness: the Edinburgh inventory.  
896 *Neuropsychologia.* 9, 97-113.
- 897 Petro, N.M., et al., 2017. Multimodal imaging evidence for a frontoparietal modulation of  
898 visual cortex during the selective processing of conditioned threat. *J Cogn Neurosci.*  
899 29, 953-67.
- 900 Ploghaus, A., et al., 1999. Dissociating pain from its anticipation in the human brain. *Science.*  
901 284, 1979-81.
- 902 Ploghaus, A., et al., 2000. Learning about pain: the neural substrate of the prediction error  
903 for aversive events. *Proc Natl Acad Sci U S A.* 97, 9281-6.
- 904 Popa, L.S., Hewitt, A.L., Ebner, T.J., 2012. Predictive and feedback performance errors are  
905 signaled in the simple spike discharge of individual Purkinje cells. *J Neurosci.* 32,  
906 15345-58.
- 907 Popa, L.S., Hewitt, A.L., Ebner, T.J., 2014. The cerebellum for jocks and nerds alike. *Front Syst*  
908 *Neurosci.* 8, 113.
- 909 Popa, L.S., Streng, M.L., Ebner, T.J., 2017. Long-term predictive and feedback encoding of  
910 motor signals in the simple spike discharge of Purkinje cells. *eNeuro.* 4,  
911 ENEURO.0036-17.2017.
- 912 Popa, L.S., Ebner, T.J., 2018. Cerebellum, predictions and errors. *Front Cell Neurosci.* 12, 524.
- 913 Price, C.J., Friston, K.J., 1997. Cognitive conjunction: a new approach to brain activation  
914 experiments. *NeuroImage.* 5, 261-70.
- 915 Prokasy, W.F., Ebel, H.C., 1967. Three components of the classically conditioned GSR in  
916 human subjects. *Journal of Experimental Psychology.* 73, 247-56.
- 917 Ramnani, N., et al., 2000. Learning- and expectation-related changes in the human brain  
918 during motor learning. *J Neurophysiol.* 84, 3026-35.

- 919 Rescorla, R.A., Wagner, A.R., 1972. A theory of Pavlovian conditioning: variations in the  
920 effectiveness of reinforcement and nonreinforcement. In: Classical conditioning II:  
921 Current research and theory. Vol. 2, A.H. Black, W.F. Prokasy, eds. Appleton-Century-  
922 Crofts, New York, pp. 64-99.
- 923 Rorden, C., Brett, M., 2000. Stereotaxic display of brain lesions. *Behav Neurol.* 12, 191-200.
- 924 Sacchetti, B., et al., 2002. Cerebellar role in fear-conditioning consolidation. *Proc Natl Acad*  
925 *Sci U S A.* 99, 8406-11.
- 926 Schlerf, J.E., et al., 2010. Evidence of a novel somatopic map in the human neocerebellum  
927 during complex actions. *J Neurophysiol.* 103, 3330-6.
- 928 Schlerf, J.E., Ivry, R.B., Diedrichsen, J., 2012. Encoding of sensory prediction errors in the  
929 human cerebellum. *J Neurosci.* 32, 4913-22.
- 930 Schmahmann, J.D., Pandya, D.N., 1997. Anatomic organization of the basilar pontine  
931 projections from prefrontal cortices in rhesus monkey. *J Neurosci.* 17, 438-58.
- 932 Schmahmann, J.D., Sherman, J.C., 1998. The cerebellar cognitive affective syndrome. *Brain.*  
933 121, 561-79.
- 934 Schmidt, K., et al., 2016. The differential effect of trigeminal vs. peripheral pain stimulation  
935 on visual processing and memory encoding is influenced by pain-related fear.  
936 *Neuroimage.* 134, 386-95.
- 937 Schultz, W., Dayan, P., Montague, P.R., 1997. A neural substrate of prediction and reward.  
938 *Science.* 275, 1593-9.
- 939 Schultz, W., 2017. Reward prediction error. *Curr Biol.* 27, R369-R71.
- 940 Setsompop, K., et al., 2012. Blipped-controlled aliasing in parallel imaging for simultaneous  
941 multislice echo planar imaging with reduced g-factor penalty. *Magn Reson Med.* 67,  
942 1210-24.
- 943 Sokolov, A.A., Miall, R.C., Ivry, R.B., 2017. The cerebellum: adaptive prediction for movement  
944 and cognition. *Trends Cogn Sci.* 21, 313-32.
- 945 Stoodley, C.J., Schmahmann, J.D., 2018. Functional topography of the human cerebellum.  
946 *Handb Clin Neurol.* 154, 59-70.



- 947 Streng, M.L., Popa, L.S., Ebner, T.J., 2017a. Climbing fibers control Purkinje cell  
948 representations of behavior. *J Neurosci.* 37, 1997-2009.
- 949 Streng, M.L., Popa, L.S., Ebner, T.J., 2017b. Climbing fibers predict movement kinematics and  
950 performance errors. *J Neurophysiol.* 118, 1888-902.
- 951 Streng, M.L., Popa, L.S., Ebner, T.J., 2018. Modulation of sensory prediction error in Purkinje  
952 cells during visual feedback manipulations. *Nat Commun.* 9, 1099.
- 953 Supple, W.F., Jr., Leaton, R.N., 1990. Lesions of the cerebellar vermis and cerebellar  
954 hemispheres: effects on heart rate conditioning in rats. *Behav Neurosci.* 104, 934-47.
- 955 Supple, W.F., Jr., Kapp, B.S., 1993. The anterior cerebellar vermis: essential involvement in  
956 classically conditioned bradycardia in the rabbit. *J Neurosci.* 13, 3705-11.
- 957 Tabbert, K., et al., 2011. Influence of contingency awareness on neural, electrodermal and  
958 evaluative responses during fear conditioning. *Soc Cogn Affect Neurosci.* 6, 495-506.
- 959 Taylor, J.A., Ivry, R.B., 2014. Cerebellar and prefrontal cortex contributions to adaptation,  
960 strategies, and reinforcement learning. *Prog Brain Res.* 210, 217-53.
- 961 Teeuwisse, W.M., Brink, W.M., Webb, A.G., 2012. Quantitative assessment of the effects of  
962 high-permittivity pads in 7 Tesla MRI of the brain. *Magn Reson Med.* 67, 1285-93.
- 963 Thürling, M., et al., 2015. Cerebellar cortex and cerebellar nuclei are concomitantly activated  
964 during eyeblink conditioning: a 7T fMRI study in humans. *J Neurosci.* 35, 1228-39.
- 965 Tovote, P., Fadok, J.P., Luthi, A., 2015. Neuronal circuits for fear and anxiety. *Nat Rev*  
966 *Neurosci.* 16, 317-31.
- 967 Tzourio-Mazoyer, N., et al., 2002. Automated anatomical labeling of activations in SPM using  
968 a macroscopic anatomical parcellation of the MNI MRI single-subject brain.  
969 *Neuroimage.* 15, 273-89.
- 970 Vansteenwegen, D., et al., 2006. Resistance to extinction in evaluative conditioning. *J Exp*  
971 *Psychol Anim Behav Process.* 32, 71-9.
- 972 Venables, P.H., Christie, M.J., 1980. Electrodermal activity. In: *Techniques in*  
973 *psychophysiology.* Vol. 54, I. Martin, P.H. Venables, eds. Wiley, New York, pp. 3-67.
- 974 Verstynen, T.D., Deshpande, V., 2011. Using pulse oximetry to account for high and low  
975 frequency physiological artifacts in the BOLD signal. *Neuroimage.* 55, 1633-44.

- 976 Vogt, B.A., 2014. Submodalities of emotion in the context of cingulate subregions. *Cortex*.  
977 59, 197-202.
- 978 Wagner, M.J., et al., 2017. Cerebellar granule cells encode the expectation of reward.  
979 *Nature*. 544, 96-100.
- 980 Welman, F.H.S.M., et al., 2018. Pain experience is somatotopically organized and overlaps  
981 with pain anticipation in the human cerebellum. *Cerebellum*. 17, 447-60.
- 982 Wolpert, D.M., Miall, R.C., Kawato, M., 1998. Internal models in the cerebellum. *Trends Cogn*  
983 *Sci*. 2, 338-47.
- 984

# Supplementary Materials

## Table of Content

|                                                                                                                                                           |           |
|-----------------------------------------------------------------------------------------------------------------------------------------------------------|-----------|
| <b>Supplementary Figure 1: First interval skin conductance responses.....</b>                                                                             | <b>2</b>  |
| <b>Supplementary Table 1: First interval skin conductance responses (Statistics) .....</b>                                                                | <b>2</b>  |
| <b>Supplementary Figure 2: Changes in cerebellar activation across blocks during acquisition and extinction .....</b>                                     | <b>3</b>  |
| <b>Supplementary Table 2: Changes in cerebellar activation across blocks during acquisition and extinction.....</b>                                       | <b>4</b>  |
| <b>Supplementary Figure 3: Comparison of cerebellar areas related to the presentation, the prediction and the omission of the aversive stimulus .....</b> | <b>5</b>  |
| <b>Supplementary Table 3: Cerebellar and whole brain conjunction analyses .....</b>                                                                       | <b>6</b>  |
| <b>Supplementary Table 4: Differences in cerebellar and whole brain activation .....</b>                                                                  | <b>8</b>  |
| <b>Supplementary Table 5: Whole brain activations during acquisition and extinction. ....</b>                                                             | <b>10</b> |
| <b>References .....</b>                                                                                                                                   | <b>13</b> |

### Supplementary Figure 1: First interval skin conductance responses

Group mean first interval response (FIR). Error bars represent standard errors of the mean. hab = habituation, acq 1, acq 2 = early and late acquisition, ext 1, ext 2 = early and late extinction.

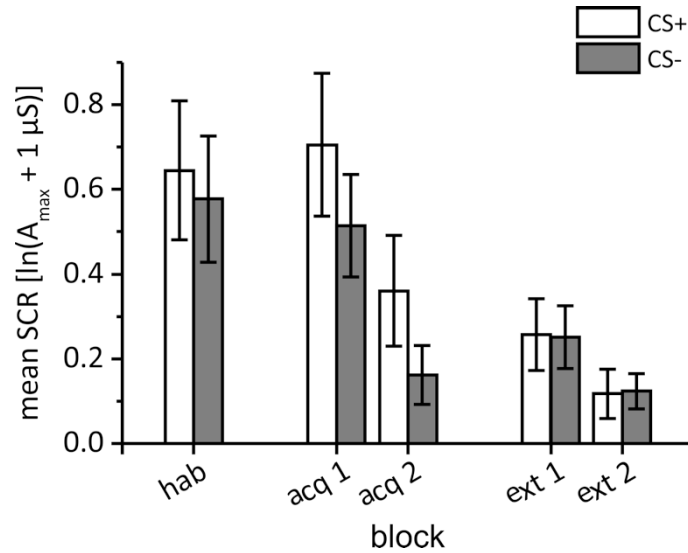

### Supplementary Table 1: First interval skin conductance responses (Statistics)

Summary of statistical findings (repeated measures ANOVA; post-hoc *t*-tests). CS type = CS+ vs. CS-; phase = acquisition vs. extinction; block = early vs. late.

| ANOVA           | contrast                     | degrees of freedom | F-value | <i>P</i> |
|-----------------|------------------------------|--------------------|---------|----------|
| acquisition     | CS type                      | 1, 21              | 7.34    | 0.013    |
|                 | block                        | 1, 21              | 17.80   | < 0.001  |
|                 | CS type × block              | 1, 21              | 0.01    | 0.918    |
| Extinction      | CS type                      | 1, 21              | 0.00    | 0.991    |
|                 | block                        | 1, 21              | 12.19   | 0.002    |
|                 | CS type × block              | 1, 21              | 0.10    | 0.751    |
| <i>t</i> -tests | contrast                     | degrees of freedom | t-value | <i>p</i> |
|                 | Habituation, CS+ - CS-       | 21                 | 1.12    | 0.275    |
|                 | Early acquisition, CS+ - CS- | 21                 | 2.60    | 0.017    |
|                 | Late acquisition, CS+ - CS-  | 21                 | 2.22    | 0.038    |
|                 | Early extinction, CS+ - CS-  | 21                 | 0.15    | 0.882    |
|                 | Late extinction, CS+ - CS-   | 21                 | -0.17   | 0.868    |

## Supplementary Figure 2: Changes in cerebellar activation across blocks during acquisition and extinction

Changes in differential cerebellar activation across acquisition and extinction blocks based on F-tests **a)** related to the prediction of the US (contrast "CS+ > CS-"), and **b)** related to the omission of the US (contrast "no-US CS+ > no-US CS-") [ $p < 0.05$  FWE corrected, using threshold-free cluster enhancement (TFCE); <http://dbm.neuro.uni-jena.de/tfce/>]. Mean  $\beta$  values across blocks are shown in the inserts. Note that all no-US CS+ trials were considered as a single block which was compared first against the early and then against the late "no-US post CS-" block. **c)** Cerebellar activation during extinction trials considering the contrast "no-US CS+ > no-US post CS-" ( $p < 0.05$  FWE corrected, TFCE).

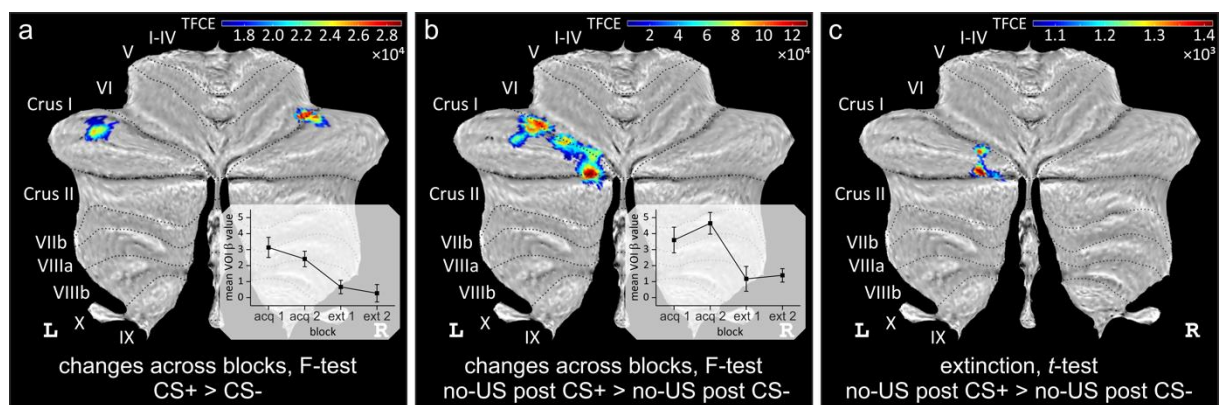

## Supplementary Table 2: Changes in cerebellar activation across blocks during acquisition and extinction

Main effect of block during acquisition and extinction. Displayed are all clusters of 20 mm<sup>3</sup> or larger. In each cluster, up to three maxima are listed separated by 8 mm or more.

| Index                                                                                                                  | Location (lobule) | Side                                                 | SUIT coordinates / mm |     |     | Cluster size / mm <sup>3</sup> | $p_{FWE}$ | TFCE    |
|------------------------------------------------------------------------------------------------------------------------|-------------------|------------------------------------------------------|-----------------------|-----|-----|--------------------------------|-----------|---------|
| <b>a) CS+ &gt; CS- : Effect of block</b> <i>F-test, TFCE, <math>p &lt; 0.05</math> FWE corr.</i>                       |                   |                                                      |                       |     |     |                                |           |         |
| 1                                                                                                                      | VI                | Right                                                | 35                    | -58 | -28 | 294                            | 0.004     | 28512.3 |
| 2                                                                                                                      | Extended cluster  | left Crus I (239), left VI (1)                       |                       |     |     |                                |           |         |
|                                                                                                                        | Crus I            | Left                                                 | -43                   | -56 | -32 | 240                            | 0.006     | 24891.7 |
|                                                                                                                        | Crus I            | Left                                                 | -35                   | -52 | -33 |                                | 0.044     | 16501.8 |
| <b>b) no-US post CS+ &gt; no-US post CS- : Effect of block</b> <i>F-test, TFCE, <math>p &lt; 0.05</math> FWE corr.</i> |                   |                                                      |                       |     |     |                                |           |         |
| 1                                                                                                                      | Extended cluster  | left Crus I (776), left VI (311), left Crus II (118) |                       |     |     |                                |           |         |
|                                                                                                                        | Crus I            | Left                                                 | -12                   | -78 | -32 | 1205                           | 0.002     | 155108  |
|                                                                                                                        | VI                | Left                                                 | -27                   | -73 | -25 |                                | 0.002     | 137279  |
|                                                                                                                        | VI                | Left                                                 | -18                   | -75 | -25 |                                | 0.008     | 120878  |
| 2                                                                                                                      | Extended cluster  | left Crus I (400), left VI (250)                     |                       |     |     |                                |           |         |
|                                                                                                                        | VI                | Left                                                 | -33                   | -64 | -27 | 650                            | 0.002     | 146662  |
|                                                                                                                        | Crus I            | Left                                                 | -35                   | -57 | -31 |                                | 0.002     | 137880  |
|                                                                                                                        | Crus I            | Left                                                 | -40                   | -64 | -31 |                                | 0.007     | 123883  |

### Supplementary Figure 3: Comparison of cerebellar areas related to the presentation, the prediction and the omission of the aversive stimulus

(a-c) Common areas of cerebellar activation considering any two of the three main acquisition contrasts as revealed by conjunction analyses testing global null hypothesis; (d-f) significant differences in activation considering any two of the three main acquisition contrasts as revealed by F tests (using TFCE; inverse tests do not show any significant activation). All data presented at a significance level of  $p < 0.05$  FWE-corrected.

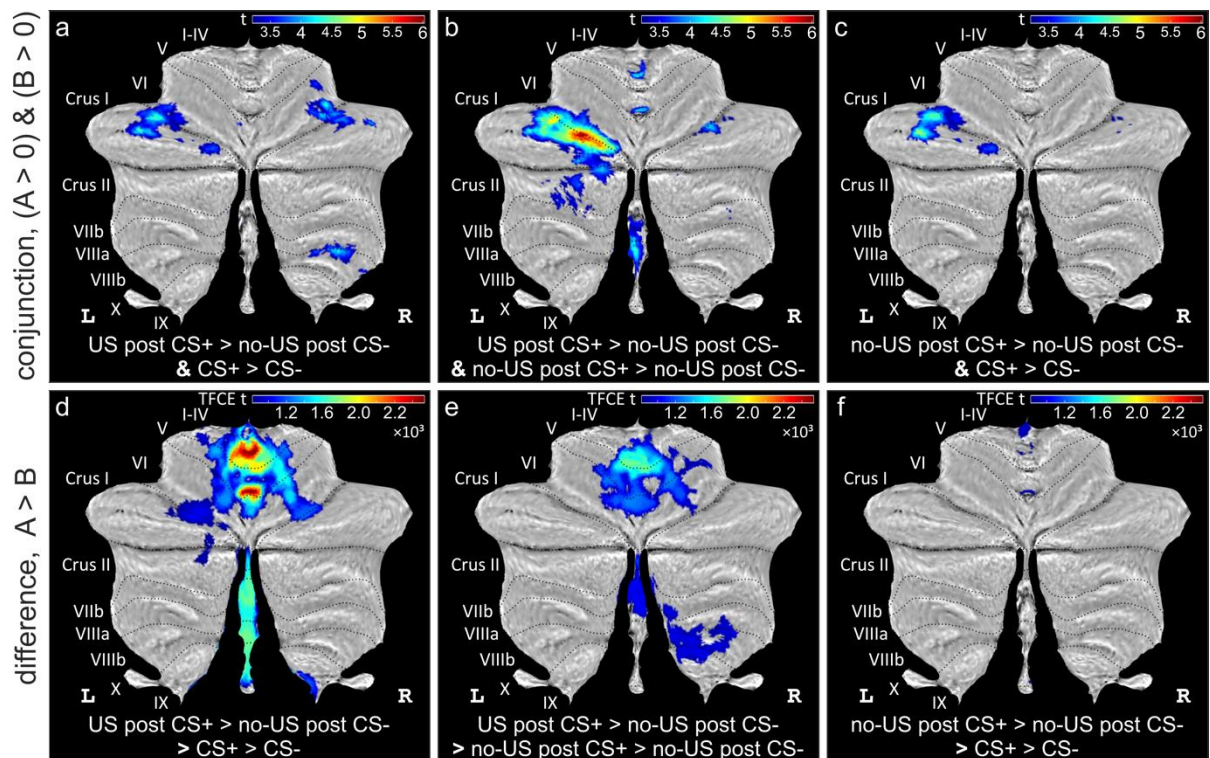



### Supplementary Table 3: Cerebellar and whole brain conjunction analyses

Cerebellar regions identified using SUIT labels (Cerebellum-SUIT.nii, Diedrichsen, 2006); whole brain regions identified using AAL atlas labels (AAL.nii, Tzourio-Mazoyer et al., 2002). Clusters with 20 or more voxels are included (global null hypothesis,  $p < 0.05$  FWE corrected). Up to three maxima per cluster are listed.

| Index                                                                                                                                | Location         | Side  | SUIT coordinates /<br>mm                                                                                                                                                       |     |     | Cluster size /<br>mm <sup>3</sup> | $p_{FWE}$ | $t$  |
|--------------------------------------------------------------------------------------------------------------------------------------|------------------|-------|--------------------------------------------------------------------------------------------------------------------------------------------------------------------------------|-----|-----|-----------------------------------|-----------|------|
| <b>Cerebellar conjunction analysis: US post CS+ &gt; no-US post CS- &amp; CS+ &gt; CS- &amp; no-US post CS+ &gt; no-US post CS-</b>  |                  |       |                                                                                                                                                                                |     |     |                                   |           |      |
| <i>global null hypothesis, FWE corrected <math>p &lt; 0.05</math></i>                                                                |                  |       |                                                                                                                                                                                |     |     |                                   |           |      |
| 1                                                                                                                                    | Extended cluster |       | left Crus I (2891), left VI (1715), left Crus II (108), gray matter (27)                                                                                                       |     |     |                                   |           |      |
|                                                                                                                                      | Crus I           | left  | -32                                                                                                                                                                            | -58 | -34 | 4730                              | < 0.001   | 4.53 |
|                                                                                                                                      | Crus I           | left  | -44                                                                                                                                                                            | -64 | -29 |                                   | < 0.001   | 4.45 |
|                                                                                                                                      | Crus I           | left  | -17                                                                                                                                                                            | -77 | -27 |                                   | < 0.001   | 3.88 |
| 2                                                                                                                                    | Extended cluster |       | right Crus I (697), right VI (409)                                                                                                                                             |     |     |                                   |           |      |
|                                                                                                                                      | Crus I           | right | 39                                                                                                                                                                             | -67 | -28 | 1106                              | < 0.001   | 3.26 |
|                                                                                                                                      | Crus I           | right | 48                                                                                                                                                                             | -61 | -28 |                                   | 0.001     | 2.9  |
|                                                                                                                                      | VI               | right | 30                                                                                                                                                                             | -69 | -24 |                                   | 0.002     | 2.89 |
| 3                                                                                                                                    | VIIIb            | right | 25                                                                                                                                                                             | -56 | -46 | 40                                | 0.001     | 2.98 |
| 4                                                                                                                                    | Crus II          | left  | -33                                                                                                                                                                            | -62 | -46 | 121                               | 0.001     | 2.94 |
| 5                                                                                                                                    | gray matter      | left  | -31                                                                                                                                                                            | -53 | -45 | 29                                | 0.003     | 2.82 |
| 6                                                                                                                                    | VIIb             | right | 32                                                                                                                                                                             | -58 | -46 | 27                                | 0.003     | 2.79 |
| <b>Whole brain conjunction analysis: US post CS+ &gt; no-US post CS- &amp; CS+ &gt; CS- &amp; no-US post CS+ &gt; no-US post CS-</b> |                  |       |                                                                                                                                                                                |     |     |                                   |           |      |
| <i>global null hypothesis, FWE corrected <math>p &lt; 0.05</math></i>                                                                |                  |       |                                                                                                                                                                                |     |     |                                   |           |      |
| 1                                                                                                                                    | Extended cluster |       | left Insula (1916), left Frontal_Inf_Tri (790), left Frontal_Inf_Oper (738), left Frontal_Inf_Orb (221), outside GM (97), left Rolandic_Oper (64), left Temporal_Pole_Sup (15) |     |     |                                   |           |      |
|                                                                                                                                      | Insula           | left  | -31                                                                                                                                                                            | 17  | 4   | 3841                              | < 0.001   | 5.7  |
|                                                                                                                                      | Frontal_Inf_Tri  | left  | -42                                                                                                                                                                            | 15  | 7   |                                   | < 0.001   | 4.6  |
|                                                                                                                                      | Insula           | left  | -31                                                                                                                                                                            | 26  | -2  |                                   | < 0.001   | 4.5  |
| 2                                                                                                                                    | Extended cluster |       | right Insula (1770), right Frontal_Inf_Tri (973), right Frontal_Inf_Oper (905), outside GM (802), right Rolandic_Oper (140), right Frontal_Inf_Orb (112), right Putamen (73)   |     |     |                                   |           |      |
|                                                                                                                                      | Frontal_Inf_Tri  | right | 37                                                                                                                                                                             | 27  | 2   | 4775                              | < 0.001   | 4.8  |
|                                                                                                                                      | Frontal_Inf_Oper | right | 43                                                                                                                                                                             | 18  | 5   |                                   | < 0.001   | 4.7  |
|                                                                                                                                      | Rolandic_Oper    | right | 53                                                                                                                                                                             | 6   | 8   |                                   | < 0.001   | 3.9  |
| 3                                                                                                                                    | Extended cluster |       | left Lob. Crus I (1839), left Lob. VI (1105), left Fusiform (1)                                                                                                                |     |     |                                   |           |      |
|                                                                                                                                      | Lob. Crus I      | left  | -32                                                                                                                                                                            | -59 | -34 | 2945                              | < 0.001   | 4.7  |
|                                                                                                                                      | Lob. Crus I      | left  | -44                                                                                                                                                                            | -66 | -28 |                                   | < 0.001   | 4.5  |
|                                                                                                                                      | Lob. Crus I      | left  | -18                                                                                                                                                                            | -77 | -27 |                                   | < 0.001   | 3.7  |
| 4                                                                                                                                    | Extended cluster |       | right SupraMarginal (2280), right Temporal_Sup (337), right Parietal_Inf (74), right Angular (48)                                                                              |     |     |                                   |           |      |

|    |                    |                                                                         |     |     |     |      |         |     |
|----|--------------------|-------------------------------------------------------------------------|-----|-----|-----|------|---------|-----|
|    | SupraMarginal      | right                                                                   | 53  | -43 | 28  | 2703 | < 0.001 | 4.3 |
|    | SupraMarginal      | right                                                                   | 60  | -39 | 29  |      | < 0.001 | 4.2 |
|    | SupraMarginal      | right                                                                   | 54  | -41 | 37  |      | < 0.001 | 4.1 |
| 5  | Extended cluster   | outside GM (310), right Thalamus (12)                                   |     |     |     |      |         |     |
|    | outside GM         | right                                                                   | 5   | -30 | -8  | 322  | < 0.001 | 4.2 |
|    | outside GM         | right                                                                   | 7   | -29 | -19 |      | < 0.001 | 3.7 |
| 6  | Thalamus           | right                                                                   | 11  | -7  | 6   | 260  | < 0.001 | 4.1 |
| 7  | Extended cluster   | right Precentral (391), right Frontal_Mid (301)                         |     |     |     |      |         |     |
|    | Precentral         | right                                                                   | 44  | 8   | 50  | 692  | < 0.001 | 4   |
|    | Precentral         | right                                                                   | 43  | 2   | 39  |      | < 0.001 | 3.4 |
| 8  | Extended cluster   | outside GM (208), left Thalamus (14)                                    |     |     |     |      |         |     |
|    | outside GM         | left                                                                    | -9  | -24 | -8  | 222  | < 0.001 | 3.9 |
|    | outside GM         | left                                                                    | -3  | -30 | -13 |      | < 0.001 | 3.8 |
|    | outside GM         | left                                                                    | -3  | -26 | -3  |      | 0.01    | 2.9 |
| 9  | Extended cluster   | right Supp_Motor_Area (685), left Supp_Motor_Area (396), outside GM (6) |     |     |     |      |         |     |
|    | Supp_Motor_Area    | right                                                                   | 6   | 15  | 51  | 1087 | < 0.001 | 3.8 |
|    | Supp_Motor_Area    | left                                                                    | 1   | 17  | 57  |      | < 0.001 | 3.8 |
|    | Supp_Motor_Area    | right                                                                   | 4   | 12  | 67  |      | < 0.001 | 3.5 |
| 10 | Extended cluster   | right Lob. VI (339), right Lob. Crus I (73)                             |     |     |     |      |         |     |
|    | Lob. VI            | right                                                                   | 37  | -61 | -27 | 412  | < 0.001 | 3.7 |
|    | Lob. VI            | right                                                                   | 26  | -64 | -32 |      | < 0.001 | 3.4 |
|    | Lob. VI            | right                                                                   | 35  | -69 | -26 |      | 0.004   | 3.1 |
| 11 | Thalamus           | left                                                                    | -12 | -9  | 7   | 162  | < 0.001 | 3.6 |
| 12 | outside GM         | left                                                                    | -7  | -16 | -10 | 38   | < 0.001 | 3.5 |
| 13 | Extended cluster   | left SupraMarginal (576), left Parietal_Inf (148), outside GM (58)      |     |     |     |      |         |     |
|    | SupraMarginal      | left                                                                    | -62 | -46 | 32  | 779  | < 0.001 | 3.5 |
|    | SupraMarginal      | left                                                                    | -60 | -41 | 24  |      | < 0.001 | 3.5 |
|    | SupraMarginal      | left                                                                    | -53 | -41 | 32  |      | < 0.001 | 3.4 |
| 14 | Frontal_Sup        | right                                                                   | 28  | 45  | 21  | 88   | < 0.001 | 3.4 |
| 15 | Frontal_Sup        | right                                                                   | 23  | 52  | 22  | 147  | < 0.001 | 3.4 |
| 16 | Precentral         | left                                                                    | -39 | -2  | 54  | 68   | < 0.001 | 3.4 |
| 17 | Lob. Crus II       | left                                                                    | -15 | -75 | -36 | 31   | 0.001   | 3.3 |
| 18 | Supp_Motor_Area    | left                                                                    | -10 | 5   | 66  | 64   | 0.001   | 3.3 |
| 19 | Frontal_Sup_Medial | left                                                                    | 1   | 30  | 33  | 203  | 0.001   | 3.3 |

## Supplementary Table 4: Differences in cerebellar and whole brain activation

Differences in cerebellar activations comparing the three main acquisition contrasts based on *F*-tests (using TFCE,  $p < 0.05$  FWE corrected). Cerebellar regions identified using SUIT labels; whole brain regions using AAL atlas labels. Clusters with 20 or more voxels are included. Up to three maxima per cluster are displayed.

| Index                                                                                                                                  | Location         | Side                                                                                                                                                                                                                                                                  | SUIT coordinates /<br>mm |     |     | Cluster size / mm <sup>3</sup> | $p_{FWE}$ | TFCE <i>F</i> |
|----------------------------------------------------------------------------------------------------------------------------------------|------------------|-----------------------------------------------------------------------------------------------------------------------------------------------------------------------------------------------------------------------------------------------------------------------|--------------------------|-----|-----|--------------------------------|-----------|---------------|
| <b>Differences in cerebellar activations: US post CS+ &gt; no-US post CS- vs. CS+ &gt; CS- vs. no-US post CS+ &gt; no-US post CS-</b>  |                  |                                                                                                                                                                                                                                                                       |                          |     |     |                                |           |               |
| <i>TFCE, FWE corrected p &lt; 0.05</i>                                                                                                 |                  |                                                                                                                                                                                                                                                                       |                          |     |     |                                |           |               |
| 1                                                                                                                                      | Extended cluster | left Crus I (1021), left VI (563)                                                                                                                                                                                                                                     |                          |     |     |                                |           |               |
|                                                                                                                                        | VI               | left                                                                                                                                                                                                                                                                  | -26                      | -73 | -25 | 1584                           | 0.002     | 755254        |
|                                                                                                                                        | Crus I           | left                                                                                                                                                                                                                                                                  | -17                      | -78 | -25 |                                | 0.002     | 733766        |
|                                                                                                                                        | Crus I           | left                                                                                                                                                                                                                                                                  | -37                      | -63 | -27 |                                | 0.017     | 508636        |
| 2                                                                                                                                      | I-IV             | right                                                                                                                                                                                                                                                                 | 3                        | -54 | -22 | 136                            | 0.014     | 520535        |
| <b>Differences in whole brain activations: US post CS+ &gt; no-US post CS- vs. CS+ &gt; CS- vs. no-US post CS+ &gt; no-US post CS-</b> |                  |                                                                                                                                                                                                                                                                       |                          |     |     |                                |           |               |
| <i>TFCE, FWE corrected p &lt; 0.05</i>                                                                                                 |                  |                                                                                                                                                                                                                                                                       |                          |     |     |                                |           |               |
| 1                                                                                                                                      | Extended cluster | left Insula (5691), outside GM (843), left Frontal_Inf_Oper (801), left Temporal_Sup (499), left Frontal_Inf_Tri (427), left Frontal_Inf_Orb (304), left Temporal_Pole_Sup (129), left Rolandic_Oper (109), left Putamen (70), left Precentral (52), left Heschl (24) |                          |     |     |                                |           |               |
|                                                                                                                                        | Insula           | left                                                                                                                                                                                                                                                                  | -39                      | -4  | -4  | 8949                           | < 0.001   | 3886919       |
|                                                                                                                                        | Temporal_Sup     | left                                                                                                                                                                                                                                                                  | -39                      | -14 | -7  |                                | < 0.001   | 2220965       |
|                                                                                                                                        | Insula           | left                                                                                                                                                                                                                                                                  | -31                      | 17  | 3   |                                | < 0.001   | 1613525       |
| 2                                                                                                                                      | Extended cluster | right Insula (5594), outside GM (2030), right Frontal_Inf_Oper (1670), right Frontal_Inf_Tri (632), right Rolandic_Oper (557), right Frontal_Inf_Orb (517), right Putamen (315), right Temporal_Pole_Sup (74), right Temporal_Sup (28)                                |                          |     |     |                                |           |               |
|                                                                                                                                        | outside GM       |                                                                                                                                                                                                                                                                       | 39                       | -3  | -8  | 11417                          | < 0.001   | 2200812       |
|                                                                                                                                        | Insula           | right                                                                                                                                                                                                                                                                 | 42                       | 9   | -6  |                                | < 0.001   | 2126720       |
|                                                                                                                                        | Insula           | right                                                                                                                                                                                                                                                                 | 40                       | -10 | -4  |                                | < 0.001   | 2095510       |
| 3                                                                                                                                      | Extended cluster | right SupraMarginal (811), right Temporal_Sup (56), outside GM (11), right Rolandic_Oper (6)                                                                                                                                                                          |                          |     |     |                                |           |               |
|                                                                                                                                        | SupraMarginal    | right                                                                                                                                                                                                                                                                 | 63                       | -38 | 27  | 884                            | 0.001     | 1294068       |
|                                                                                                                                        | SupraMarginal    | right                                                                                                                                                                                                                                                                 | 56                       | -33 | 27  |                                | 0.008     | 1024451       |
|                                                                                                                                        | SupraMarginal    | right                                                                                                                                                                                                                                                                 | 62                       | -26 | 22  |                                | 0.016     | 9025467       |
| 4                                                                                                                                      | outside GM       | left                                                                                                                                                                                                                                                                  | -5                       | -29 | -8  | 179                            | 0.010     | 966886        |
| 5                                                                                                                                      | Extended cluster | left Lob. Crus I (240), left Lob. VI (195)                                                                                                                                                                                                                            |                          |     |     |                                |           |               |
|                                                                                                                                        | Lob. VI          | left                                                                                                                                                                                                                                                                  | -27                      | -74 | -23 | 435                            | 0.015     | 904621        |
|                                                                                                                                        | Lob. Crus I      | left                                                                                                                                                                                                                                                                  | -19                      | -78 | -24 |                                | 0.017     | 881553        |
| 6                                                                                                                                      | SupraMarginal    | left                                                                                                                                                                                                                                                                  | -55                      | -39 | 25  | 244                            | 0.018     | 862433        |
| 7                                                                                                                                      | outside GM       | left                                                                                                                                                                                                                                                                  | -61                      | -37 | 41  | 40                             | 0.036     | 785741        |
| 8                                                                                                                                      | SupraMarginal    | left                                                                                                                                                                                                                                                                  | -59                      | -24 | 17  | 55                             | 0.038     | 776401        |
| 9                                                                                                                                      | Postcentral      | left                                                                                                                                                                                                                                                                  | -57                      | -23 | 25  | 33                             | 0.039     | 772784        |

|    |               |       |    |     |    |    |       |        |
|----|---------------|-------|----|-----|----|----|-------|--------|
| 10 | SupraMarginal | right | 64 | -33 | 36 | 37 | 0.042 | 760703 |
|----|---------------|-------|----|-----|----|----|-------|--------|

---

## Supplementary Table 5: Whole brain activations during acquisition and extinction.

Displayed are all clusters of 20 mm<sup>3</sup> or larger. In each cluster up to three maxima are listed separated by 8 mm or more.

| Index                                                                         | Location         | Side  | SUIT coordinates /<br>mm                                                                                                                                                                                                                                                                                                                                                                                                                                                                                                                                                                                                                                                                                                                                                                                                                                                                                                                                                                                                                                                                                                                                                                                                                                                                                                                                                                                                                                                                                                                                                                                                                                                                                                                                                                                                                                                                                                                                                                                                                                                                                                                                                                                                                                                                                                                                                                                                                                                                                                                                                                                                                                                                                            |     |    | Cluster size / mm <sup>3</sup> | $p_{FWE}$ | TFCE    |
|-------------------------------------------------------------------------------|------------------|-------|---------------------------------------------------------------------------------------------------------------------------------------------------------------------------------------------------------------------------------------------------------------------------------------------------------------------------------------------------------------------------------------------------------------------------------------------------------------------------------------------------------------------------------------------------------------------------------------------------------------------------------------------------------------------------------------------------------------------------------------------------------------------------------------------------------------------------------------------------------------------------------------------------------------------------------------------------------------------------------------------------------------------------------------------------------------------------------------------------------------------------------------------------------------------------------------------------------------------------------------------------------------------------------------------------------------------------------------------------------------------------------------------------------------------------------------------------------------------------------------------------------------------------------------------------------------------------------------------------------------------------------------------------------------------------------------------------------------------------------------------------------------------------------------------------------------------------------------------------------------------------------------------------------------------------------------------------------------------------------------------------------------------------------------------------------------------------------------------------------------------------------------------------------------------------------------------------------------------------------------------------------------------------------------------------------------------------------------------------------------------------------------------------------------------------------------------------------------------------------------------------------------------------------------------------------------------------------------------------------------------------------------------------------------------------------------------------------------------|-----|----|--------------------------------|-----------|---------|
| <b>US post CS+ &gt; no-US post CS- FWE corrected <math>p &lt; 0.05</math></b> |                  |       |                                                                                                                                                                                                                                                                                                                                                                                                                                                                                                                                                                                                                                                                                                                                                                                                                                                                                                                                                                                                                                                                                                                                                                                                                                                                                                                                                                                                                                                                                                                                                                                                                                                                                                                                                                                                                                                                                                                                                                                                                                                                                                                                                                                                                                                                                                                                                                                                                                                                                                                                                                                                                                                                                                                     |     |    |                                |           |         |
| 1                                                                             | Extended cluster |       | outside GM (80294), left Insula (12830), right Frontal_Mid (12274), right Insula (12057), right SupraMarginal (11987), left Lob. Crus I (10060), left Lob. VI (9432), right Frontal_Inf_Tri (8704), left Cingulum_Mid (8377), right Lob. VI (7744), left SupraMarginal (7569), right Rolandic_Oper (6804), right Cingulum_Mid (6651), right Temporal_Mid (6472), right Temporal_Sup (6419), right Frontal_Inf_Oper (6290), right Supp_Motor_Area (6280), left Parietal_Inf (6124), left Supp_Motor_Area (5999), right Putamen (5904), right Lob. VIII (5843), left Rolandic_Oper (5485), left Calcarine (5359), left Frontal_Inf_Oper (5036), left Temporal_Sup (4941), left Cingulum_Ant (4765), left Lob. VIII (4743), right Frontal_Inf_Orb (4713), left Lob. IV-V (4711), left Lob. Crus II (4613), vermal Lob. IV-V (4533), right Parietal_Inf (4373), left Thalamus (4352), left Precuneus (4172), right Caudate (3976), left Putamen (3966), right Calcarine (3872), right Frontal_Sup_Medial (3740), right Thalamus (3555), right Lob. IV-V (3534), right Cingulum_Ant (3524), left Postcentral (3294), right Frontal_Sup (3091), left Frontal_Inf_Tri (2837), right Lob. IX (2752), left Frontal_Sup_Medial (2619), left Lingual (2361), right Precuneus (2331), left Frontal_Sup (2166), right Lob. Crus I (2113), left Caudate (2106), vermal Lob. VI (1945), left Frontal_Inf_Orb (1856), right Precentral (1738), right Lingual (1552), right Temporal_Pole_Sup (1540), left Lob. IX (1502), vermal Lob. VIII (1445), left Precentral (1378), left Temporal_Pole_Sup (1349), left Lob. VIIb (1280), left Pallidum (1139), vermal Lob. IX (1040), left Temporal_Inf (981), right Postcentral (952), left Heschl (923), right Pallidum (875), right Hippocampus (839), left Paracentralobule (757), right Amygdala (726), left Hippocampus (704), vermal Lob. III (667), right Frontal_Mid_Orb (631), right Angular (554), right Heschl (489), left Amygdala (472), right Temporal_Inf (436), left Paracentralobule (362), left Cuneus (357), right Frontal_Sup_Orb (347), left Fusiform (324), right Fusiform (302), right Parietal_Sup (300), right Lob. Crus II (300), left Lob. III (277), vermal Lob. VII (268), right Lob. VIIb (241), right Olfactory (205), right Lob. III (180), vermal Lob. X (166), vermal Lob. 1_2 (146), left ParaHippocampal (144), left Olfactory (115), right ParaHippocampal (80), left Lob. X (72), right Lob. X (72), left Cingulum_Post (71), right Temporal_Pole_Mid (53), left Frontal_Mid (31), right Cingulum_Post (25), left Temporal_Mid (21), right Rectus (19), right Cuneus (16), left Parietal_Sup (14), left Frontal_Sup_Orb (12), left Occipital_Sup (1) |     |    |                                |           |         |
|                                                                               | Insula           | right | 42                                                                                                                                                                                                                                                                                                                                                                                                                                                                                                                                                                                                                                                                                                                                                                                                                                                                                                                                                                                                                                                                                                                                                                                                                                                                                                                                                                                                                                                                                                                                                                                                                                                                                                                                                                                                                                                                                                                                                                                                                                                                                                                                                                                                                                                                                                                                                                                                                                                                                                                                                                                                                                                                                                                  | -3  | -7 | 390038                         | < 0.001   | 18195.4 |
|                                                                               | Insula           | left  | -37                                                                                                                                                                                                                                                                                                                                                                                                                                                                                                                                                                                                                                                                                                                                                                                                                                                                                                                                                                                                                                                                                                                                                                                                                                                                                                                                                                                                                                                                                                                                                                                                                                                                                                                                                                                                                                                                                                                                                                                                                                                                                                                                                                                                                                                                                                                                                                                                                                                                                                                                                                                                                                                                                                                 | -10 | -5 |                                | < 0.001   | 18164.9 |
|                                                                               | Insula           | right | 41                                                                                                                                                                                                                                                                                                                                                                                                                                                                                                                                                                                                                                                                                                                                                                                                                                                                                                                                                                                                                                                                                                                                                                                                                                                                                                                                                                                                                                                                                                                                                                                                                                                                                                                                                                                                                                                                                                                                                                                                                                                                                                                                                                                                                                                                                                                                                                                                                                                                                                                                                                                                                                                                                                                  | -11 | -9 |                                | < 0.001   | 17925.9 |
| 2                                                                             | Extended cluster |       | left Precuneus (833), left Parietal_Sup (92), left Cuneus (60), left Occipital_Sup (34)                                                                                                                                                                                                                                                                                                                                                                                                                                                                                                                                                                                                                                                                                                                                                                                                                                                                                                                                                                                                                                                                                                                                                                                                                                                                                                                                                                                                                                                                                                                                                                                                                                                                                                                                                                                                                                                                                                                                                                                                                                                                                                                                                                                                                                                                                                                                                                                                                                                                                                                                                                                                                             |     |    |                                |           |         |
|                                                                               | Precuneus        | left  | -9                                                                                                                                                                                                                                                                                                                                                                                                                                                                                                                                                                                                                                                                                                                                                                                                                                                                                                                                                                                                                                                                                                                                                                                                                                                                                                                                                                                                                                                                                                                                                                                                                                                                                                                                                                                                                                                                                                                                                                                                                                                                                                                                                                                                                                                                                                                                                                                                                                                                                                                                                                                                                                                                                                                  | -74 | 42 | 1019                           | 0.029     | 3199.4  |
|                                                                               | Cuneus           | left  | -3                                                                                                                                                                                                                                                                                                                                                                                                                                                                                                                                                                                                                                                                                                                                                                                                                                                                                                                                                                                                                                                                                                                                                                                                                                                                                                                                                                                                                                                                                                                                                                                                                                                                                                                                                                                                                                                                                                                                                                                                                                                                                                                                                                                                                                                                                                                                                                                                                                                                                                                                                                                                                                                                                                                  | -80 | 40 |                                | 0.047     | 2779.1  |
| 3                                                                             | Extended cluster |       | left Parietal_Sup (1146), left Postcentral (577), left Precuneus (50), outside GM (26)                                                                                                                                                                                                                                                                                                                                                                                                                                                                                                                                                                                                                                                                                                                                                                                                                                                                                                                                                                                                                                                                                                                                                                                                                                                                                                                                                                                                                                                                                                                                                                                                                                                                                                                                                                                                                                                                                                                                                                                                                                                                                                                                                                                                                                                                                                                                                                                                                                                                                                                                                                                                                              |     |    |                                |           |         |
|                                                                               | Postcentral      | left  | -25                                                                                                                                                                                                                                                                                                                                                                                                                                                                                                                                                                                                                                                                                                                                                                                                                                                                                                                                                                                                                                                                                                                                                                                                                                                                                                                                                                                                                                                                                                                                                                                                                                                                                                                                                                                                                                                                                                                                                                                                                                                                                                                                                                                                                                                                                                                                                                                                                                                                                                                                                                                                                                                                                                                 | -43 | 67 | 1799                           | 0.032     | 3118.3  |
|                                                                               | Parietal_Sup     | left  | -18                                                                                                                                                                                                                                                                                                                                                                                                                                                                                                                                                                                                                                                                                                                                                                                                                                                                                                                                                                                                                                                                                                                                                                                                                                                                                                                                                                                                                                                                                                                                                                                                                                                                                                                                                                                                                                                                                                                                                                                                                                                                                                                                                                                                                                                                                                                                                                                                                                                                                                                                                                                                                                                                                                                 | -49 | 69 |                                | 0.033     | 3102.4  |

|   |                  |                                                                                               |     |     |     |      |       |        |
|---|------------------|-----------------------------------------------------------------------------------------------|-----|-----|-----|------|-------|--------|
|   | Postcentral      | left                                                                                          | -25 | -37 | 73  |      | 0.044 | 2855.1 |
| 4 | Extended cluster | left Frontal_Mid (2317), left Frontal_Inf_Tri (1775), left Frontal_Sup (235), outside GM (91) |     |     |     |      |       |        |
|   | Frontal_Inf_Tri  | left                                                                                          | -46 | 42  | 4   | 4418 | 0.033 | 3102.1 |
|   | Frontal_Mid      | left                                                                                          | -31 | 49  | 24  |      | 0.036 | 3003.0 |
|   | Frontal_Mid      | left                                                                                          | -45 | 39  | 21  |      | 0.036 | 3002.0 |
| 5 | outside GM       |                                                                                               | 33  | -36 | 18  | 52   | 0.037 | 2997.7 |
| 6 | outside GM       |                                                                                               | 12  | -92 | -14 | 34   | 0.037 | 2984.9 |
| 7 | Extended cluster | left Temporal_Mid (741), outside GM (17)                                                      |     |     |     |      |       |        |
|   | Temporal_Mid     | left                                                                                          | -56 | -58 | 3   | 758  | 0.037 | 2981.6 |
|   | outside GM       |                                                                                               | -46 | -53 | 2   |      | 0.040 | 2939.3 |
|   | Temporal_Mid     | left                                                                                          | -48 | -54 | 10  |      | 0.041 | 2908.4 |
| 8 | Frontal_Mid      | left                                                                                          | -35 | 43  | 1   | 53   | 0.049 | 2758.8 |

**CS+ > CS- FWE corrected  $p < 0.05$**

|   |                  |                                                                                                                                                                                                                                                                                                                        |     |     |     |       |       |        |
|---|------------------|------------------------------------------------------------------------------------------------------------------------------------------------------------------------------------------------------------------------------------------------------------------------------------------------------------------------|-----|-----|-----|-------|-------|--------|
| 1 | Extended cluster | left Supp_Motor_Area (3488), left Cingulum_Mid (2817), right Supp_Motor_Area (2769), right Cingulum_Mid (1757), left Cingulum_Ant (701), left Frontal_Sup_Medial (684), outside GM (554), right Frontal_Sup_Medial (228), right Cingulum_Ant (209), left Frontal_Sup (58), right Frontal_Sup (53), left Precentral (3) |     |     |     |       |       |        |
|   | Supp_Motor_Area  | right                                                                                                                                                                                                                                                                                                                  | 2   | 10  | 61  | 13321 | 0.013 | 3708.7 |
|   | Cingulum_Ant     | left                                                                                                                                                                                                                                                                                                                   | 1   | 27  | 29  |       | 0.013 | 3676.5 |
|   | Supp_Motor_Area  | left                                                                                                                                                                                                                                                                                                                   | -3  | 11  | 54  |       | 0.014 | 3631.8 |
| 2 | Extended cluster | right SupraMarginal (1153), right Temporal_Sup (5), right Angular (4)                                                                                                                                                                                                                                                  |     |     |     |       |       |        |
|   | SupraMarginal    | right                                                                                                                                                                                                                                                                                                                  | 61  | -41 | 27  | 1162  | 0.016 | 3519.4 |
|   | SupraMarginal    | right                                                                                                                                                                                                                                                                                                                  | 53  | -40 | 29  |       | 0.020 | 3343.3 |
|   | SupraMarginal    | right                                                                                                                                                                                                                                                                                                                  | 50  | -40 | 37  |       | 0.039 | 2764.9 |
| 3 | Extended cluster | left Insula (1674), left Frontal_Inf_Tri (565), left Frontal_Inf_Orb (155), left Frontal_Inf_Oper (144), outside GM (18)                                                                                                                                                                                               |     |     |     |       |       |        |
|   | Insula           | left                                                                                                                                                                                                                                                                                                                   | -39 | 15  | 7   | 2556  | 0.018 | 3442.6 |
|   | Insula           | left                                                                                                                                                                                                                                                                                                                   | -30 | 17  | 7   |       | 0.018 | 3418.6 |
|   | Insula           | left                                                                                                                                                                                                                                                                                                                   | -29 | 27  | -2  |       | 0.022 | 3240.4 |
| 4 | Extended cluster | right Lob. VI (729), right Lob. Crus I (332)                                                                                                                                                                                                                                                                           |     |     |     |       |       |        |
|   | Lob. VI          | right                                                                                                                                                                                                                                                                                                                  | 35  | -48 | -30 | 1061  | 0.022 | 3252.6 |
|   | Lob. VI          | right                                                                                                                                                                                                                                                                                                                  | 32  | -60 | -24 |       | 0.025 | 3113.8 |
|   | Lob. Crus I      | right                                                                                                                                                                                                                                                                                                                  | 39  | -58 | -32 |       | 0.028 | 3016.2 |
| 5 | Extended cluster | right Insula (1464), right Frontal_Inf_Tri (899), outside GM (745), right Frontal_Inf_Oper (369), right Frontal_Inf_Orb (164), right Putamen (1)                                                                                                                                                                       |     |     |     |       |       |        |
|   | Frontal_Inf_Tri  | right                                                                                                                                                                                                                                                                                                                  | 39  | 29  | 1   | 3642  | 0.023 | 3214.5 |
|   | Insula           | right                                                                                                                                                                                                                                                                                                                  | 34  | 22  | 13  |       | 0.023 | 3190.4 |
|   | Insula           | right                                                                                                                                                                                                                                                                                                                  | 30  | 27  | 3   |       | 0.024 | 3148.5 |
| 6 | outside GM       |                                                                                                                                                                                                                                                                                                                        | -6  | -29 | -7  | 200   | 0.023 | 3210.8 |
| 7 | outside GM       |                                                                                                                                                                                                                                                                                                                        | 9   | -4  | 6   | 280   | 0.024 | 3138.4 |
| 8 | Extended cluster | outside GM (182)                                                                                                                                                                                                                                                                                                       |     |     |     |       |       |        |
|   | outside GM       |                                                                                                                                                                                                                                                                                                                        | 6   | -28 | -7  | 182   | 0.026 | 3062.1 |

|    |                  |                                            |     |     |     |     |       |        |
|----|------------------|--------------------------------------------|-----|-----|-----|-----|-------|--------|
|    | outside GM       |                                            | 9   | -27 | -18 |     | 0.049 | 2596.5 |
| 9  | Extended cluster | left Lob. Crus I (480), left Lob. VI (116) |     |     |     |     |       |        |
|    | Lob. Crus I      | left                                       | -44 | -59 | -32 | 596 | 0.032 | 2915.4 |
|    | Lob. Crus I      | left                                       | -37 | -54 | -34 |     | 0.034 | 2887.5 |
|    | Lob. Crus I      | left                                       | -31 | -60 | -33 |     | 0.045 | 2655.9 |
| 10 | Extended cluster | left SupraMarginal (226)                   |     |     |     |     |       |        |
|    | SupraMarginal    | left                                       | -54 | -41 | 31  | 226 | 0.046 | 2636.7 |
|    | SupraMarginal    | left                                       | -61 | -46 | 32  |     | 0.049 | 2573.9 |

**Acquisition – no-US post CS+ > no-US post CS- FWE corrected  $p < 0.05$**

|   |                    |                                                                                                                                                                                                                                                                                                                                                                                                                                                                    |     |     |     |       |       |        |
|---|--------------------|--------------------------------------------------------------------------------------------------------------------------------------------------------------------------------------------------------------------------------------------------------------------------------------------------------------------------------------------------------------------------------------------------------------------------------------------------------------------|-----|-----|-----|-------|-------|--------|
| 1 | Extended cluster   | right Frontal_Mid (11734), outside GM (8351), right Frontal_Inf_Oper (5575), right Frontal_Inf_Tri (5442), right Insula (4346), right Frontal_Inf_Orb (2531), right Putamen (2180), right Frontal_Sup (2001), right Precentral (952), right Thalamus (481), right Caudate (458), right Rolandic_Oper (390), right Frontal_Mid_Orb (327), right Pallidum (278), right Frontal_Sup_Orb (224), right Temporal_Pole_Sup (119), left Thalamus (57), right Olfactory (3) |     |     |     |       |       |        |
|   | Insula             | right                                                                                                                                                                                                                                                                                                                                                                                                                                                              | 36  | 20  | 0   | 45449 | 0.001 | 4926.3 |
|   | Frontal_Inf_Orb    | right                                                                                                                                                                                                                                                                                                                                                                                                                                                              | 33  | 24  | -11 |       | 0.001 | 4895.6 |
|   | Frontal_Inf_Tri    | right                                                                                                                                                                                                                                                                                                                                                                                                                                                              | 50  | 20  | 4   |       | 0.001 | 4781.1 |
| 2 | Extended cluster   | left Lob. Crus I (6445), left Lob. VI (3064), left Lob. Crus II (773), outside GM (119), left Fusiform (14), left Lob. VIII (4)                                                                                                                                                                                                                                                                                                                                    |     |     |     |       |       |        |
|   | Lob. Crus I        | left                                                                                                                                                                                                                                                                                                                                                                                                                                                               | -24 | -77 | -26 | 10419 | 0.001 | 4685.0 |
|   | Lob. Crus I        | left                                                                                                                                                                                                                                                                                                                                                                                                                                                               | -35 | -75 | -24 |       | 0.001 | 4649.6 |
|   | Lob. Crus I        | left                                                                                                                                                                                                                                                                                                                                                                                                                                                               | -15 | -79 | -22 |       | 0.001 | 4634.5 |
| 3 | Extended cluster   | left Insula (2780), left Frontal_Inf_Oper (1231), left Frontal_Inf_Tri (841), outside GM (642), left Putamen (499), left Frontal_Inf_Orb (424), left Rolandic_Oper (104), left Temporal_Pole_Sup (47), left Precentral (31)                                                                                                                                                                                                                                        |     |     |     |       |       |        |
|   | Insula             | left                                                                                                                                                                                                                                                                                                                                                                                                                                                               | -31 | 18  | 3   | 6599  | 0.002 | 4254.5 |
|   | Insula             | left                                                                                                                                                                                                                                                                                                                                                                                                                                                               | -30 | 22  | -7  |       | 0.003 | 4117.3 |
|   | Putamen            | left                                                                                                                                                                                                                                                                                                                                                                                                                                                               | -27 | 11  | 4   |       | 0.006 | 3672.0 |
| 4 | Extended cluster   | left Frontal_Sup_Medial (3900), right Supp_Motor_Area (2877), right Frontal_Sup_Medial (2070), left Supp_Motor_Area (1762), right Cingulum_Mid (592), outside GM (290), right Frontal_Sup (216), left Cingulum_Ant (115), right Cingulum_Ant (104), left Cingulum_Mid (95), left Frontal_Sup (57)                                                                                                                                                                  |     |     |     |       |       |        |
|   | Frontal_Sup_Medial | left                                                                                                                                                                                                                                                                                                                                                                                                                                                               | -5  | 27  | 49  | 12078 | 0.006 | 3607.7 |
|   | Supp_Motor_Area    | right                                                                                                                                                                                                                                                                                                                                                                                                                                                              | 6   | 19  | 58  |       | 0.011 | 3225.5 |
|   | Supp_Motor_Area    | left                                                                                                                                                                                                                                                                                                                                                                                                                                                               | 0   | 24  | 55  |       | 0.012 | 3212.4 |
| 5 | Extended cluster   | left Parietal_Inf (465), outside GM (259), left SupraMarginal (83)                                                                                                                                                                                                                                                                                                                                                                                                 |     |     |     |       |       |        |
|   | outside GM         |                                                                                                                                                                                                                                                                                                                                                                                                                                                                    | -60 | -46 | 41  | 807   | 0.018 | 2923.1 |
|   | outside GM         |                                                                                                                                                                                                                                                                                                                                                                                                                                                                    | -63 | -51 | 33  |       | 0.023 | 2819.0 |
|   | outside GM         |                                                                                                                                                                                                                                                                                                                                                                                                                                                                    | -60 | -40 | 47  |       | 0.038 | 2539.2 |
| 6 | Lob. IV-V          | vermal                                                                                                                                                                                                                                                                                                                                                                                                                                                             | 1   | -55 | -22 | 139   | 0.030 | 2661.4 |
| 7 | Extended cluster   | right SupraMarginal (178), right Angular (173)                                                                                                                                                                                                                                                                                                                                                                                                                     |     |     |     |       |       |        |
|   | Angular            | right                                                                                                                                                                                                                                                                                                                                                                                                                                                              | 52  | -50 | 26  | 351   | 0.038 | 2534.1 |
|   | SupraMarginal      | right                                                                                                                                                                                                                                                                                                                                                                                                                                                              | 60  | -49 | 26  |       | 0.041 | 2482.2 |
| 8 | Extended cluster   | right SupraMarginal (484), right Parietal_Inf (290), outside GM (7)                                                                                                                                                                                                                                                                                                                                                                                                |     |     |     |       |       |        |



|                  |       |    |     |    |     |       |        |
|------------------|-------|----|-----|----|-----|-------|--------|
| SupraMarginal    | right | 60 | -47 | 42 | 781 | 0.040 | 2507.7 |
| SupraMarginal    | right | 54 | -43 | 38 |     | 0.041 | 2472.1 |
| SupraMarginal    | right | 62 | -34 | 39 |     | 0.042 | 2461.7 |
| 9 outside GM     |       | -4 | -8  | -7 | 4   | 0.041 | 2476.7 |
| 10 Cingulum_Ant  | right | 12 | 17  | 27 | 38  | 0.046 | 2431.0 |
| 11 SupraMarginal | right | 65 | -40 | 27 | 24  | 0.049 | 2384.4 |

---

## References

- Diedrichsen, J., 2006. A spatially unbiased atlas template of the human cerebellum. *Neuroimage*. 33, 127-38.
- Tzourio-Mazoyer, N., et al., 2002. Automated anatomical labeling of activations in SPM using a macroscopic anatomical parcellation of the MNI MRI single-subject brain. *Neuroimage*. 15, 273-89.
